# Supplementary material
Source: publisher figshare collection journal article supplement (https://karger.figshare.com/ndownloader/files/24989819)
Supplement: Supplementary file 1 [file 24989819]

# Heterogeneity of Effect of Net Ultrafiltration Rate Among Critically Ill Adults Receiving Continuous Renal Replacement Therapy

## eMethods

**eMethod 1.** Multiple imputation procedure

**eMethod 2.** Cluster process

**eMethod 3.** Comparison of clusters found after multiple imputation with those found in the complete case analysis

## eTables

**eTable 1** – Number and Percentage of Missing

**eTable 2** – Summary of Posterior Distributions for Heterogeneity of Effect in Each Cluster

**eTable 3** – Baseline Patient Characteristics According to Each Clinical Subgroup

**eTable 4** – Characteristics of Study Treatment According to Each Clinical Subgroup

**eTable 5** – Summary of Posterior Distributions for Heterogeneity of Effect in Each Clinical Subgroup

**eTable 6** – Results of the Bayesian Regression Model

**eTable 7** – Results of the Bayesian Regression Model

## eFigures

**eFigure 1.** Distributions of Imputed and Unimputed Values

**eFigure 2.** Low (< 1.01 mL/kg/h), middle (1.01 – 1.75 mL/kg/h) and high (> 1.75 mL/kg/h) groups of NUF rate mortality according to A) baseline characteristics, B) quintiles of fluid balance at day 1, C) quintiles of modified SOFA, D) quintiles of eGFR, E) quintiles of APACHE–III, and F) cardiovascular SOFA

**eFigure 3.** Optimal number of clusters according to the silhouette method

**eFigure 4.** Prediction strength according to *kamila* algorithm for different number of simulated clusters in cross-validation

**eFigure 5.** tSNE Plot

**eFigure 6.** Probability that the effect size is lower in cluster 2 than in cluster 1

**eFigure 7.** Bayesian heterogeneity of effect

**eFigure 8.** Bayesian heterogeneity of effect

**eFigure 9.** Probability that the effect size is lower in the subgroup of No edema in the subgroup of Edema

**eFigure 10.** Predicted mortality probability in different scenarios in the clusters

**eFigure 11.** Predicted mortality probability in different scenarios in the clinical subgroups

**eFigure 12.** Odds ratio for 90–day mortality with 95% credible interval according to NUF rate groups and the clinical subgroups

**eFigure 13.** Odds ratio for 90–day mortality with 95% credible interval according to NUF rate groups and the clusters further adjusted by the total non–CRRT intravenous fluids

**eFigure 14.** Odds ratio for 90–day mortality with 95% credible interval according to NUF rate groups and the clinical subgroups further adjusted by the total non–CRRT intravenous fluids

**eFigure 15.** Odds ratio for 90–day mortality with 95% credible interval according to NUF rate groups and the clusters by the total non–CRRT intravenous fluids

**eFigure 16.** Odds ratio for 90–day mortality with 95% credible interval according to NUF rate groups and the clinical subgroups by the total non–CRRT intravenous fluids

**eFigure 17.** Cubic spline plot for predicted mortality according to NUF rate groups for all participants and the clinical subgroups by clusters and edema

### **eMethod 1. Multiple imputation procedure**

For patients with unknown premorbid creatinine and eGFR, source of admission and SOFA score and components, multilevel multiple imputation by chained equation method (MICE) was used to impute it. By leveraging known patient characteristics and accounting for uncertainty in the multiple estimations of missing values, multiple imputation preserves sample size and reduces bias while examining association between variables. Before imputation, the percentage of missing in the variables was assessed (**eTable 1**).

The following variables were considered in the multiple imputation model for premorbid creatinine and eGFR: age, gender, weight, treatment allocation, APACHE–III and 90–day mortality. For the multiple imputation of source of admission, SOFA and its components, the following variables were included: age, gender, weight, treatment allocation, presence of sepsis, use of mechanical ventilation, APACHE–III, and 90–day mortality. Multilevel multiple imputation was conducted using a two–level normal model with homogeneous within group variances (*2l.pan*) for continuous variables, a two–level logistic model (*2l.bin*) for categorical variables, 50 iterations and 5 databases. This multilevel multiple imputation model takes into account the cluster of the data with centers as the cluster variable [1,2].

Since total SOFA and SOFA components are passive variables, the method ‘Just Another Variable’ was used, imputing the source variables (all components) and also the derived variables (total SOFA) separately. It is expected that the ‘Just Another Variable’ approach will make a very bad approximation to the joint density of the variables; however, it can yield valid

inferences for the analysis model [3,4]. Distribution of imputed values are shown in **eFigure 1** in **Online Supplement**.

*kamila*, as the majority of the cluster algorithms, does not handle multiple datasets from multiple imputation. Thus, in the end, we opted to replace the missing values by the mean of the value from the five datasets after imputation. However, as we now the potential limitations from this strategy, a sensitivity analysis comparing the clusters found after imputation to those found from complete case analysis (711 patients) is shown in **eMethod 3** in **Online Supplement**.

## References

1. Drechsler J. (2015) Multiple Imputation of Multilevel Missing Data—Rigor Versus Simplicity. *J Educ Behav* 40:69-95
2. Taljaard M, Donner A, Klar N (2008) Imputation strategies for missing continuous outcomes in cluster randomized trials. *Biom J* 50:329-45
3. White IR, Royston P, Wood AM (2011) Multiple imputation using chained equations: Issues and guidance for practice. *Stat Med* 30:377-99
4. Von Hippel PT (2009) How to impute squares, interactions, and other transformed variables. *Sociological Methodology* 39:265-91.

## **eMethod 2. Cluster process**

For cluster detection, based on clinical relevance, the following variables were selected a priori: APACHE–III, weight, premorbid eGFR, source of admission, mechanical ventilation, presence of severe sepsis, presence of oliguria, presence of severe organ edema, cardiovascular and respiratory SOFA score, and fluid balance at day 1.

We used the K–means for mixed large data (*kamila*) method to detect clusters. The best number of clusters was defined by inspecting the prediction strength of clusters after 1,000 cross–validations [1,2]. In addition, we performed a visual display of such clustering method using the Barnes–Hut t–distributed Stochastic Neighbor Embedding (tSNE) method with Gower’s distance clustering to confirm and visually display the results [3] and the average silhouette method with Partitioning Around Medoids (PAM) algorithm to confirm and visually display the optimal number of clusters. In addition, we analyzed two clinically relevant subgroups: ‘Edema’ (patients with baseline clinically significant organ edema) and ‘No edema’.

## **References**

1. Foss AH, Markatou M. *kamila* (2018) clustering mixed-type data in R and Hadoop. J Stat Softw 13:1e44.
2. Tibshirani R, Walther G (2005) Cluster validation by prediction strength. J Comput Graph Stat 3:511e28.
3. van der Maaten LJP, Hinton GE (2008) Visualizing high dimensional data using t-SNE. J Mach Learn Res 1:2579e605.

### eMethod 3. Comparison of clusters found after multiple imputation with those found in the complete case analysis

As with the analysis after imputation, the cluster analysis in the complete case analysis also identified two distinct clusters. The optimal number of clusters was also confirmed to be two by the silhouette method, prediction strength, and the tSNE plot from Gower's distance as shown below.

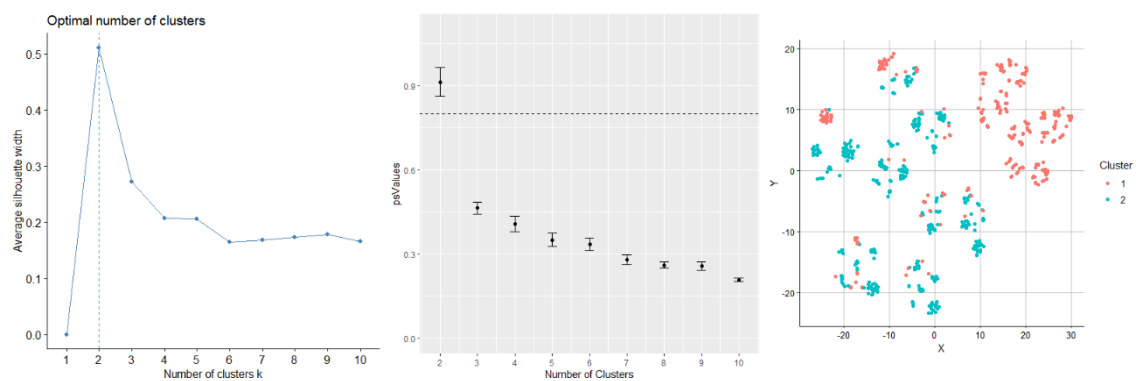

As shown below, the agreement between the clusters found after imputation and in the complete case analysis is good.

#### Agreement of the Clusters

| With Multiple Imputation | In Complete Case Analysis |     |
|--------------------------|---------------------------|-----|
|                          | 1                         | 2   |
| 1                        | 400                       | 60  |
| 2                        | 1                         | 250 |

Cohen Kappa: 0.78 (0.82 to 0.86)

As shown in the tables below, the baseline, clinical outcomes, and therapeutic characteristics between the clusters found by the two methods are virtually identical.

### eMethod 3 – Characteristics of the Clusters With Multiple Imputation (MI) or complete case analysis (CCA)

|                                         | Cluster 1            |                     | Cluster 2            |                     |
|-----------------------------------------|----------------------|---------------------|----------------------|---------------------|
|                                         | With MI<br>(n = 941) | In CCA<br>(n = 401) | With MI<br>(n = 493) | In CCA<br>(n = 310) |
| Age, years                              | 64.2 ± 14.9          | 64.9 ± 14.6         | 65.4 ± 14.8          | 66.1 ± 14.0         |
| Female gender                           | 335 (35.6)           | 137 (34.2)          | 175 (35.5)           | 120 (38.7)          |
| Weight, kg                              | 81.2 ± 12.9          | 80.5 ± 12.8         | 79.6 ± 12.7          | 79.9 ± 13.4         |
| Higher–intensity group                  | 461 (49.0)           | 197 (49.1)          | 247 (50.1)           | 154 (49.7)          |
| eGFR                                    | 60.1 ± 31.7          | 59.3 ± 31.9         | 49.7 ± 29.2          | 53.4 ± 30.1         |
| Time in ICU before randomization, hours | 58.5 ± 133.9         | 51.8 ± 109.1        | 40.0 ± 86.7          | 30.0 ± 51.6         |
| Use of vasopressors*                    | 862 (91.7)           | 364 (90.8)          | 171 (34.8)           | 159 (51.3)          |
| Use of mechanical ventilation           | 940 (99.9)           | 401 (100.0)         | 117 (23.7)           | 108 (34.8)          |
| Severe sepsis                           | 507 (53.9)           | 198 (49.4)          | 202 (41.0)           | 143 (46.1)          |
| APACHE III score                        | 106.1 ± 27.0         | 105.3 ± 26.4        | 94.8 ± 20.9          | 99.7 ± 23.2         |
| Modified total SOFA score**             | 11.33 ± 2.3          | 11.2 ± 2.2          | 8.2 ± 2.6            | 8.7 ± 2.7           |
| Cardiovascular                          | 3.6 ± 0.8            | 3.5 ± 0.9           | 1.5 ± 1.6            | 2.0 ± 1.7           |
| Respiratory                             | 3.2 ± 0.6            | 3.2 ± 0.4           | 1.8 ± 1.0            | 1.9 ± 1.1           |
| Coagulation                             | 1.1 ± 1.2            | 1.0 ± 1.1           | 0.7 ± 1.0            | 0.8 ± 1.1           |
| Liver                                   | 1.0 ± 1.1            | 0.9 ± 1.1           | 0.8 ± 1.2            | 0.8 ± 1.1           |
| Renal                                   | 2.5 ± 1.0            | 2.4 ± 1.0           | 3.1 ± 0.9            | 3.1 ± 1.0           |
| Source of admission                     |                      |                     |                      |                     |
| Emergency department                    | 207 / 877 (23.6)     | 45 (11.2)           | 134 / 466 (28.8)     | 127 (41.0)          |
| Hospital ward                           | 200 / 877 (22.8)     | 118 (29.4)          | 178 / 466 (38.2)     | 105 (33.9)          |
| Transfer from another ICU               | 84 / 877 (9.6)       | 38 (9.5)            | 25 / 466 (5.4)       | 15 (4.8)            |
| Transfer from another hospital          | 101 / 877 (11.5)     | 53 (13.2)           | 48 / 466 (10.3)      | 19 (6.1)            |
| OR after emergency surgery              | 161 / 877 (18.4)     | 60 (15.0)           | 43 / 466 (9.2)       | 16 (5.2)            |
| OR after elective surgery               | 124 / 877 (14.1)     | 87 (21.7)           | 38 / 466 (8.2)       | 28 (9.0)            |
| final_diagnosis....                     |                      |                     |                      |                     |
| Admission diagnosis                     |                      |                     |                      |                     |
| Nonoperative                            |                      |                     |                      |                     |
| Cardiovascular                          | 367 (39.0)           | 152 (37.9)          | 153 (31.0)           | 110 (35.5)          |
| Genitourinary                           | 52 (5.5)             | 24 (6.0)            | 173 (35.1)           | 100 (32.3)          |
| Respiratory                             | 112 (11.9)           | 47 (11.7)           | 33 (6.7)             | 26 (8.4)            |
| Gastrointestinal                        | 53 (5.6)             | 9 (2.2)             | 18 (3.7)             | 15 (4.8)            |
| Other                                   | 36 (3.8)             | 12 (3.0)            | 27 (5.5)             | 12 (3.9)            |
| Operative                               |                      |                     |                      |                     |
| Cardiovascular                          | 214 (22.7)           | 111 (27.7)          | 53 (10.8)            | 31 (10.0)           |
| Gastrointestinal                        | 78 (8.3)             | 33 (8.2)            | 19 (3.9)             | 11 (3.5)            |
| Trauma                                  | 13 (1.4)             | 2 (0.5)             | 6 (1.2)              | 1 (0.3)             |

### eMethod 3 – Characteristics of the Clusters With Multiple Imputation (MI) or complete case analysis (CCA)

|                                          | Cluster 1            |                     | Cluster 2            |                     |
|------------------------------------------|----------------------|---------------------|----------------------|---------------------|
|                                          | With MI<br>(n = 941) | In CCA<br>(n = 401) | With MI<br>(n = 493) | In CCA<br>(n = 310) |
| Other                                    | 16 (1.7)             | 11 (2.7)            | 11 (2.2)             | 4 (1.3)             |
| Criteria for randomization <sup>a</sup>  |                      |                     |                      |                     |
| Oliguria (urine, < 400 mL/day)           | 565 (60.0)           | 236 (58.9)          | 290 (58.8)           | 190 (61.3)          |
| Hyperkalemia (K > 6.5 mmol/L)            | 52 (5.5)             | 23 (5.7)            | 59 (12.0)            | 32 (10.3)           |
| Severe acidemia (pH < 7.20)              | 393 (41.8)           | 168 (41.9)          | 113 (22.9)           | 99 (31.9)           |
| BUN > 70 mg/dL (plasma urea > 25 mmol/L) | 303 (32.2)           | 120 (29.9)          | 292 (59.2)           | 168 (54.2)          |
| Creatinine > 3.4 mg/dL (300 µmol/L)      | 337 (35.8)           | 132 (32.9)          | 342 (69.4)           | 199 (64.2)          |
| Severe organ edema associated with AKI   | 439 (46.7)           | 221 (55.1)          | 195 (39.6)           | 101 (32.6)          |
| BUN, mmol/L                              | 20.6 ± 11.0          | 20.0 ± 10.7         | 29.2 ± 14.0          | 27.4 ± 12.9         |
| Creatinine before randomization, µmol/L  | 280.3 ± 137.2        | 273.6 ± 128.7       | 441.1 ± 241.3        | 414.7 ± 229.4       |
| pH                                       | 7.25 ± 0.14          | 7.24 ± 0.13         | 7.28 ± 0.11          | 7.26 ± 0.12         |
| Bicarbonate, mmol/L                      | 18.8 ± 5.7           | 19.0 ± 5.4          | 17.5 ± 6.1           | 16.8 ± 6.0          |
| Base excess, mmol/L                      | -8.1 ± 6.9           | -7.9 ± 6.9          | -8.4 ± 7.0           | -9.6 ± 7.1          |
| Clinical outcomes                        |                      |                     |                      |                     |
| RRT dependence among survivors at day 28 | 68 / 536 (12.7)      | 34 (14.8)           | 52 / 363 (14.3)      | 24 (10.9)           |
| 90-day mortality                         | 467 / 940 (49.7)     | 203 (50.7)          | 167 / 493 (33.9)     | 116 (37.4)          |

Data are mean ± standard deviation or No (%)

AKI: acute kidney injury; APACHE: Acute Physiology and Chronic Health Evaluation; BUN: blood urea nitrogen; GFR: estimated glomerular filtration rate; ICU: intensive care unit; OR: operating room; SOFA: Sequential Organ Failure Assessment; MI: multiple imputation; CCA: complete case analysis

\* Defined as a cardiovascular SOFA score ≥ 3

\*\* Not considering the neurological component

<sup>a</sup> A given patient may have met more than one of these criteria.

**eMethod 3 – Therapeutic Characteristics of the Clusters With and Without Multiple Imputation**

|                                       | Cluster 1                    |                             | Cluster 2                    |                             |
|---------------------------------------|------------------------------|-----------------------------|------------------------------|-----------------------------|
|                                       | With MI<br>( <i>n</i> = 941) | In CCA<br>( <i>n</i> = 401) | With MI<br>( <i>n</i> = 493) | In CCA<br>( <i>n</i> = 310) |
| Cumulative net ultrafiltration, mL    | 12974.8 ± 15521.9            | 14332.9 ± 16701.8           | 11111.2 ± 15129.2            | 9827.2 ± 13188.3            |
| Net ultrafiltration rate, mL/kg/h     | 1.45 ± 1.01                  | 1.58 ± 1.15                 | 1.39 ± 0.89                  | 1.31 ± 0.92                 |
| Net ultrafiltration rate category     |                              |                             |                              |                             |
| < 1.01 mL/kg/h                        | 297 (31.6)                   | 114 (28.4)                  | 179 (36.3)                   | 126 (40.6)                  |
| 1.01 – 1.75 mL/kg/h                   | 321 (34.1)                   | 133 (33.2)                  | 156 (31.6)                   | 91 (29.4)                   |
| > 1.75 mL/kg/h                        | 323 (34.3)                   | 154 (38.4)                  | 158 (32.0)                   | 93 (30.0)                   |
| Duration of study treatment, days     | 6.4 ± 8.3                    | 6.9 ± 9.6                   | 5.8 ± 8.2                    | 5.2 ± 7.4                   |
| Flow rate of effluent, mL/kg/h        | 26.2 ± 7.34                  | 26.5 ± 7.1                  | 25.4 ± 7.4                   | 26.2 ± 7.4                  |
| Dose delivered, %                     | 0.82 ± 0.16                  | 0.83 ± 0.14                 | 0.79 ± 0.16                  | 0.82 ± 0.15                 |
| BUN, mmol/L/day                       | 13.4 ± 5.9                   | 12.9 ± 5.4                  | 15.3 ± 7.5                   | 14.4 ± 7.0                  |
| Serum creatinine, µmol/L/day          | 169.7 ± 73.2                 | 162.9 ± 65.7                | 229.4 ± 134.7                | 208.1 ± 124.2               |
| Dialysate and replacement fluid, mL/h | 2017.6 ± 652.8               | 2025.4 ± 650.0              | 1927.0 ± 680.6               | 1991.3 ± 667.6              |
| Dose of effluent, mL/h/day            | 2115.0 ± 644.4               | 2123.6 ± 627.8              | 2009.9 ± 632.7               | 2080.5 ± 655.7              |
| Fluid balance excluding NUF volume    |                              |                             |                              |                             |
| At day 1, mL                          | 1742.9 ± 2359.2              | 1708.2 ± 2240.8             | 1010.1 ± 1613.6              | 1200.9 ± 1902.8             |
| Daily, mL/d*                          | 1753.8 ± 1523.3              | 1717.9 ± 1424.4             | 1229.6 ± 1113.6              | 1390.2 ± 1381.0             |
| Cumulative, mL*                       | 10733.3 ± 14632.8            | 11462.5 ± 15210.0           | 8212.7 ± 12359.4             | 7886.9 ± 12022.6            |
| Fluid balance including NUF volume    |                              |                             |                              |                             |
| At day 1, mL                          | 942.9 ± 2570.1               | 813.0 ± 2414.7              | 219.3 ± 1839.3               | 446.4 (2166.2)              |
| Daily, mL/d*                          | -29.2 ± 1909.2               | -185.4 ± 1716.5             | -385.3 ± 1341.3              | -152.2 (1741.2)             |
| Cumulative, mL*                       | -2253.0 ± 10843.7            | -2878.9 ± 9669.4            | -2915.9 ± 8871.9             | -1961.9 (7722.8)            |
| Total non–CRRT fluids <sup>a</sup>    |                              |                             |                              |                             |
| At day 1, mL                          | 2465.4 ± 2487.4              | 2438.3 ± 2407.1             | 1621.2 ± 1678.6              | 1816.1 ± 1977.3             |
| Daily, mL/d*                          | 2714.4 ± 1605.4              | 2640.5 ± 1542.0             | 2132.9 ± 1174.8              | 2322.2 ± 1412.2             |
| Cumulative, mL*                       | 16272.3 ± 18775.2            | 17028.7 ± 18927.1           | 12723.7 ± 15500.6            | 12273.4 ± 15538.6           |
| Total non–CRRT IV fluids <sup>b</sup> |                              |                             |                              |                             |
| At day 1, mL                          | 2326.6 ± 2419.4              | 2298.2 ± 2338.9             | 1579.9 ± 1635.7              | 1756.8 ± 879.5              |
| Daily, mL/d*                          | 2480.6 ± 1522.1              | 2415.8 ± 1426.3             | 2026.4 ± 1092.5              | 2190.4 ± 1330.1             |
| Cumulative, mL*                       | 14649.7 ± 16537.0            | 15431.8 ± 16863.1           | 11843.5 ± 14179.2            | 11267.3 ± 13877.2           |
| Enteral nutrition                     |                              |                             |                              |                             |
| At day 1, mL                          | 262.8 ± 564.7                | 262.6 ± 491.4               | 203.4 ± 466.8                | 245.1 ± 936.2               |
| Daily, mL/d*                          | 364.8 ± 536.4                | 334.6 ± 516.7               | 305.9 ± 533.4                | 350.4 ± 656.4               |
| Cumulative, mL*                       | 1993.3 ± 3682.1              | 1940.4 ± 3542.3             | 1815.6 ± 4665.1              | 1986.7 ± 5568.4             |
| Urine output                          |                              |                             |                              |                             |
| At day 1, mL                          | 374.8 ± 649.7                | 357.9 ± 524.1               | 451.9 ± 701.1                | 437.5 ± 732.3               |



**eMethod 3 – Therapeutic Characteristics of the Clusters With and Without Multiple Imputation**

|                                  | Cluster 1            |                     | Cluster 2            |                     |
|----------------------------------|----------------------|---------------------|----------------------|---------------------|
|                                  | With MI<br>(n = 941) | In CCA<br>(n = 401) | With MI<br>(n = 493) | In CCA<br>(n = 310) |
| Daily, mL/d*                     | 528.8 ± 611.9        | 508.5 ± 555.6       | 650.9 ± 748.5        | 639.1 ± 759.9       |
| Cumulative, mL*                  | 2819.6 ± 3701.3      | 2925.8 ± 4053.0     | 2689.7 ± 3112.3      | 2455.6 ± 2866.2     |
| Blood losses <sup>c</sup>        |                      |                     |                      |                     |
| At day 1, mL                     | 63.4 ± 269.9         | 76.4 ± 299.5        | 14.5 ± 100.9         | 14.5 ± 112.2        |
| Daily, mL/d*                     | 61.2 ± 267.2         | 61.9 ± 246.7        | 36.1 ± 200.3         | 43.4 ± 230.2        |
| Cumulative, mL*                  | 358.7 ± 1564.1       | 348.6 ± 1187.5      | 260.7 ± 1431.4       | 277.2 ± 1344.3      |
| Other output <sup>d</sup>        |                      |                     |                      |                     |
| At day 1, mL                     | 285.3 ± 612.4        | 297.9 ± 636.5       | 154.6 ± 533.7        | 176.0 ± 687.6       |
| Daily, mL/d*                     | 369.5 ± 554.1        | 346.7 ± 555.2       | 222.7 ± 452.9        | 256.4 ± 533.4       |
| Cumulative, mL*                  | 2372.3 ± 4558.3      | 2300.3 ± 4292.4     | 1578.0 ± 4344.7      | 1675.3 ± 4778.7     |
| Filters used daily               | 0.9 ± 0.5            | 0.8 ± 0.5           | 0.9 ± 0.5            | 0.9 ± 0.5           |
| Patients treated with IHD in ICU | 63 (6.7)             | 37 (9.2)            | 43 (8.7)             | 22 (7.1)            |

Data are mean ± standard deviation or No (%)  
BUN: blood urea nitrogen; ICU: intensive care unit; IHD: intermittent hemodialysis; IV: intravenous; MI: multiple imputation; CCA: complete case analysis  
\* considering only days where continuous renal replacement therapy was used  
<sup>a</sup> considering blood, blood products, albumin, enteral nutrition, total parenteral nutrition and other intravenous fluids  
<sup>b</sup> considering blood, blood products, albumin, total parenteral nutrition and other intravenous fluids  
<sup>c</sup> considering any blood loss in and outside the ICU  
<sup>d</sup> other fluid losses (e.g., gastrointestinal losses, drain losses and other)

**eTable 1 – Number and Percentage of Missing**

|                                  | <b>Total<br/>(n = 1434)</b> | <b>&lt; 1.01 mL/kg/h<br/>(n = 476)</b> | <b>1.01 – 1.75 mL/kg/h<br/>(n = 477)</b> | <b>&gt; 1.75 mL/kg/h<br/>(n = 481)</b> |
|----------------------------------|-----------------------------|----------------------------------------|------------------------------------------|----------------------------------------|
| <b>Baseline data</b>             | 0 (0.0)                     | 0 (0.0)                                | 0 (0.0)                                  | 0 (0.0)                                |
| Age                              | 0 (0.0)                     | 0 (0.0)                                | 0 (0.0)                                  | 0 (0.0)                                |
| Gender                           | 0 (0.0)                     | 0 (0.0)                                | 0 (0.0)                                  | 0 (0.0)                                |
| Weight                           | 0 (0.0)                     | 0 (0.0)                                | 0 (0.0)                                  | 0 (0.0)                                |
| Premorbid creatinine             | 637 (44.4)                  | 203 (42.6)                             | 227 (47.6)                               | 207 (43.0)                             |
| Premorbid eGFR                   | 637 (44.4)                  | 203 (42.6)                             | 227 (47.6)                               | 207 (43.0)                             |
| Time in ICU before randomization | 0 (0.0)                     | 0 (0.0)                                | 0 (0.0)                                  | 0 (0.0)                                |
| Mechanical ventilation           | 0 (0.0)                     | 0 (0.0)                                | 0 (0.0)                                  | 0 (0.0)                                |
| Severe sepsis                    | 0 (0.0)                     | 0 (0.0)                                | 0 (0.0)                                  | 0 (0.0)                                |
| Source of admission              | 91 (6.3)                    | 30 (6.3)                               | 30 (6.3)                                 | 31 (6.4)                               |
| Nonoperative admission diagnosis | 0 (0.0)                     | 0 (0.0)                                | 0 (0.0)                                  | 0 (0.0)                                |
| Operative admission diagnosis    | 0 (0.0)                     | 0 (0.0)                                | 0 (0.0)                                  | 0 (0.0)                                |
| Oliguria (< 400 mL/day)          | 0 (0.0)                     | 0 (0.0)                                | 0 (0.0)                                  | 0 (0.0)                                |
| Hyperkalemia                     | 0 (0.0)                     | 0 (0.0)                                | 0 (0.0)                                  | 0 (0.0)                                |
| Severe acidemia                  | 0 (0.0)                     | 0 (0.0)                                | 0 (0.0)                                  | 0 (0.0)                                |
| BUN > 70 mg/dL                   | 0 (0.0)                     | 0 (0.0)                                | 0 (0.0)                                  | 0 (0.0)                                |
| Creatinine > 3.4 mg/dL           | 0 (0.0)                     | 0 (0.0)                                | 0 (0.0)                                  | 0 (0.0)                                |
| Severe organ edema               | 0 (0.0)                     | 0 (0.0)                                | 0 (0.0)                                  | 0 (0.0)                                |
| BUN before randomization         | 1 (0.0)                     | 1 (0.2)                                | 0 (0.0)                                  | 0 (0.0)                                |
| Creatinine before randomization  | 4 (0.3)                     | 1 (0.2)                                | 1 (0.2)                                  | 2 (0.4)                                |
| pH before randomization          | 55 (3.8)                    | 31 (6.5)                               | 12 (2.5)                                 | 12 (2.5)                               |
| Bicarbonate before randomization | 9 (0.6)                     | 5 (1.0)                                | 3 (0.6)                                  | 1 (0.2)                                |
| Base excess before randomization | 64 (4.5)                    | 38 (8.0)                               | 13 (2.7)                                 | 13 (2.7)                               |
| <b>Severity of illness</b>       |                             |                                        |                                          |                                        |
| APACHE–III                       | 1 (0.0)                     | 0 (0.0)                                | 0 (0.0)                                  | 1 (0.2)                                |
| Total SOFA                       | 97 (6.8)                    | 53 (11.1)                              | 22 (4.6)                                 | 22 (4.6)                               |
| Cardiovascular SOFA              | 2 (0.1)                     | 1 (0.2)                                | 0 (0.0)                                  | 1 (0.2)                                |
| Respiratory SOFA                 | 43 (3.0)                    | 21 (4.4)                               | 12 (2.5)                                 | 10 (2.1)                               |
| Coagulation SOFA                 | 8 (0.5)                     | 6 (1.2)                                | 0 (0.0)                                  | 2 (0.4)                                |
| Liver SOFA                       | 59 (4.1)                    | 34 (7.1)                               | 12 (2.5)                                 | 13 (2.7)                               |
| Renal SOFA                       | 4 (0.3)                     | 4 (0.8)                                | 0 (0.0)                                  | 0 (0.0)                                |
| <b>Exposure</b>                  |                             |                                        |                                          |                                        |
| NUF rate                         | 0 (0.0)                     | 0 (0.0)                                | 0 (0.0)                                  | 0 (0.0)                                |
| NUF volume                       | 0 (0.0)                     | 0 (0.0)                                | 0 (0.0)                                  | 0 (0.0)                                |
| Fluid balance at day 1           | 0 (0.0)                     | 0 (0.0)                                | 0 (0.0)                                  | 0 (0.0)                                |
| Cumulative fluid balance         | 0 (0.0)                     | 0 (0.0)                                | 0 (0.0)                                  | 0 (0.0)                                |

**eTable 1 – Number and Percentage of Missing**

|                  | Total<br>(n = 1434) | < 1.01 mL/kg/h<br>(n = 476) | 1.01 – 1.75 mL/kg/h<br>(n = 477) | > 1.75 mL/k/h<br>(n = 481) |
|------------------|---------------------|-----------------------------|----------------------------------|----------------------------|
| <b>Outcome</b>   |                     |                             |                                  |                            |
| 90–day mortality | 1 (0.0)             | 0 (0.0)                     | 0 (0.0)                          | 1 (0.2)                    |
| 90–day follow–up | 1 (0.0)             | 0 (0.0)                     | 0 (0.0)                          | 1 (0.2)                    |

*eGRF: estimated glomerular filtration rate; ICU: intensive care unit; BUN: blood urea nitrogen; APACHE: Acute Physiology and Chronic Health Evaluation; SOFA: Sequential Organ Failure Assessment; NUF: net ultrafiltration*

**eTable 2 – Summary of Posterior Distributions for Heterogeneity of Effect in Each Cluster**

| Subgroup                                                           | Mean   | SD    | Q <sub>2.5</sub> | Q <sub>25</sub> | Median | Q <sub>75</sub> | Q <sub>97.5</sub> | Prob<br>OR > 1.0 | Prob<br>OR > 1.2 |
|--------------------------------------------------------------------|--------|-------|------------------|-----------------|--------|-----------------|-------------------|------------------|------------------|
| <b>NUF Rate &gt; 1.75 mL/kg/h vs. NUF rate &lt; 1.01 mL/kg/h</b>   |        |       |                  |                 |        |                 |                   |                  |                  |
| Cluster 1                                                          | 0.116  | 0.161 | -0.199           | 0.006           | 0.116  | 0.224           | 0.432             | 0.762            | 0.340            |
| Cluster 2                                                          | 0.138  | 0.227 | -0.306           | -0.015          | 0.136  | 0.291           | 0.582             | 0.729            | 0.423            |
| All Patients                                                       | 0.123  | 0.132 | -0.136           | 0.033           | 0.122  | 0.211           | 0.384             | 0.824            | 0.327            |
| <b>NUF Rate &gt; 1.75 mL/kg/h vs. NUF Rate 1.01 – 1.75 mL/kg/h</b> |        |       |                  |                 |        |                 |                   |                  |                  |
| Cluster 1                                                          | 0.481  | 0.160 | 0.168            | 0.373           | 0.479  | 0.588           | 0.796             | 0.999            | 0.969            |
| Cluster 2                                                          | 0.238  | 0.240 | -0.232           | 0.075           | 0.237  | 0.399           | 0.705             | 0.840            | 0.592            |
| All Patients                                                       | 0.407  | 0.133 | 0.147            | 0.317           | 0.407  | 0.496           | 0.666             | 0.999            | 0.954            |
| <b>NUF Rate 1.01 – 1.75 mL/kg/h vs. NUF Rate &lt; 1.01 mL/kg/h</b> |        |       |                  |                 |        |                 |                   |                  |                  |
| Cluster 1                                                          | -0.370 | 0.163 | -0.693           | -0.479          | -0.370 | -0.260          | -0.050            | 0.011            | 0.000            |
| Cluster 2                                                          | -0.097 | 0.234 | -0.554           | -0.256          | -0.098 | 0.062           | 0.361             | 0.340            | 0.116            |
| All Patients                                                       | -0.280 | 0.133 | -0.541           | -0.369          | -0.280 | -0.191          | -0.019            | 0.018            | 0.000            |

*SD: standard deviation*

**eTable 3 – Baseline Characteristics of the Patients According to Each Clinical Subgroup**

|                                             | <b>Edema<br/>(n = 634)</b> | <b>No Edema<br/>(n = 800)</b> | <b>p value</b> |
|---------------------------------------------|----------------------------|-------------------------------|----------------|
| Age, years                                  | 64.4 ± 14.7                | 64.8 ± 14.9                   | 0.639          |
| Female gender                               | 242 (38.2)                 | 268 (33.5)                    | 0.075          |
| Weight at enrollment, kg                    | 81.2 ± 12.7                | 80.2 ± 13.0                   | 0.164          |
| Higher–intensity group                      | 319 (50.3)                 | 389 (48.6)                    | 0.560          |
| eGFR prior to hospital admission            | 55.9 ± 29.9                | 56.6 ± 32.2                   | 0.748          |
| Time in ICU before randomization, hours     | 66.1 ± 156.5               | 41.1 ± 78.6                   | < 0.001        |
| Use of vasopressors at enrollment*          | 462 (73.0)                 | 571 (71.5)                    | 0.563          |
| Use of mechanical ventilation at enrollment | 489 (77.1)                 | 568 (71.0)                    | 0.011          |
| Severe sepsis at enrollment                 | 311 (49.1)                 | 398 (49.8)                    | 0.835          |
| APACHE III score                            | 100.8 ± 26.1               | 103.2 ± 25.2                  | 0.075          |
| Modified total SOFA score at enrollment**   | 10.3 ± 2.7                 | 10.3 ± 2.8                    | 0.991          |
| Cardiovascular                              | 2.9 ± 1.5                  | 2.8 ± 1.5                     | 0.467          |
| Respiratory                                 | 2.9 ± 0.9                  | 2.6 ± 1.0                     | < 0.001        |
| Coagulation                                 | 0.9 ± 1.1                  | 1.0 ± 1.1                     | 0.321          |
| Liver                                       | 1.0 ± 1.2                  | 0.9 ± 1.1                     | 0.325          |
| Renal                                       | 2.6 ± 1.1                  | 2.8 ± 1.0                     | < 0.001        |
| Source of admission                         |                            |                               | 0.036          |
| Emergency department                        | 133 (22.9)                 | 208 (27.3)                    |                |
| Hospital ward                               | 175 (30.1)                 | 203 (26.7)                    |                |
| Transfer from another ICU                   | 56 (9.6)                   | 53 (7.0)                      |                |
| Transfer from another hospital              | 57 (9.8)                   | 92 (12.1)                     |                |
| OR after emergency surgery                  | 81 (13.9)                  | 123 (16.2)                    |                |
| OR after elective surgery                   | 80 (13.7)                  | 82 (10.8)                     |                |
| Admission diagnosis                         |                            |                               | 0.158          |
| Nonoperative                                |                            |                               |                |
| Cardiovascular                              | 225 (35.5)                 | 295 (36.9)                    |                |
| Genitourinary                               | 96 (15.1)                  | 129 (16.1)                    |                |
| Respiratory                                 | 74 (11.7)                  | 71 (8.9)                      |                |
| Gastrointestinal                            | 32 (5.0)                   | 39 (4.9)                      |                |
| Other                                       | 21 (3.3)                   | 42 (5.2)                      |                |
| Operative                                   |                            |                               |                |
| Cardiovascular                              | 124 (19.6)                 | 143 (17.9)                    |                |
| Gastrointestinal                            | 42 (6.6)                   | 55 (6.9)                      |                |
| Trauma                                      | 12 (1.9)                   | 7 (0.9)                       |                |
| Other                                       | 8 (1.3)                    | 19 (2.4)                      |                |
| Criteria for randomization <sup>a</sup>     |                            |                               |                |

**eTable 3 – Baseline Characteristics of the Patients According to Each Clinical Subgroup**

|                                          | <b>Edema<br/>(n = 634)</b> | <b>No Edema<br/>(n = 800)</b> | <b>p value</b> |
|------------------------------------------|----------------------------|-------------------------------|----------------|
| Oliguria (urine, < 400 mL/day)           | 340 (53.6)                 | 515 (64.4)                    | < 0.001        |
| Hyperkalemia (K > 6.5 mmol/L)            | 48 (7.6)                   | 63 (7.9)                      | 0.909          |
| Severe acidemia (pH < 7.20)              | 200 (31.5)                 | 306 (38.2)                    | 0.010          |
| BUN > 70 mg/dL (plasma urea > 25 mmol/L) | 267 (42.1)                 | 328 (41.0)                    | 0.711          |
| Creatinine > 3.4 mg/dL (300 µmol/L)      | 261 (41.2)                 | 418 (52.2)                    | < 0.001        |
| Severe organ edema associated with AKI   | 634 (100.0)                | 0 (0.0)                       | < 0.001        |
| BUN before randomization, mmol/L         | 23.4 ± 12.3                | 23.7 ± 13.1                   | 0.723          |
| Creatinine before randomization, µmol/L  | 312.0 ± 177.8              | 353.7 ± 206.2                 | < 0.001        |
| pH before randomization                  | 7.27 ± 0.13                | 7.25 ± 0.13                   | 0.012          |
| Bicarbonate before randomization, mmol/L | 19.1 ± 5.5                 | 17.8 ± 6.0                    | < 0.001        |
| Base excess before randomization, mmol/L | -7.4 ± 6.7                 | -8.8 ± 7.1                    | < 0.001        |
| Clinical outcomes                        |                            |                               |                |
| RRT dependence among survivors at day 28 | 58 (14.9)                  | 62 (12.1)                     | 0.258          |
| 90-day mortality                         | 290 (45.7)                 | 344 (43.1)                    | 0.335          |

Data are mean ± standard deviation or No (%)

AKI: acute kidney injury; APACHE: Acute Physiology and Chronic Health Evaluation; BUN: blood urea nitrogen; GFR: estimated glomerular filtration rate; ICU: intensive care unit; OR: operating room; SOFA: Sequential Organ Failure Assessment

\* Defined as a cardiovascular SOFA score ≥ 3

\*\* Not considering the neurological component

<sup>a</sup> A given patient may have met more than one of these criteria.

**eTable 4 – Characteristics of Study Treatment According to Each Clinical Subgroup**

|                                                                 | <b>Edema<br/>(<i>n</i> = 634)</b> | <b>No Edema<br/>(<i>n</i> = 800)</b> | <b><i>p</i> value</b> |
|-----------------------------------------------------------------|-----------------------------------|--------------------------------------|-----------------------|
| Cumulative net ultrafiltration at the end of treatment days, mL | 13763.6 ± 15479.7                 | 11201.2 ± (15266.1                   | 0.002                 |
| Net ultrafiltration rate, mL/kg/h                               | 1.61 ± 1.07                       | 1.29 ± 0.87                          | < 0.001               |
| Net ultrafiltration rate category                               |                                   |                                      | < 0.001               |
| < 1.01 mL/kg/h                                                  | 171 (27.0)                        | 305 (38.1)                           |                       |
| 1.01 – 1.75 mL/kg/h                                             | 207 (32.6)                        | 270 (33.8)                           |                       |
| > 1.75 mL/kg/h                                                  | 256 (40.4)                        | 225 (28.1)                           |                       |
| Duration of study treatment, days                               | 6.3 ± 8.3                         | 6.1 ± 8.3                            | 0.733                 |
| Flow rate of effluent, mL/kg/h                                  | 26.1 ± 7.3                        | 25.8 ± 7.4                           | 0.521                 |
| Dose delivered, %                                               | 0.81 ± 0.16                       | 0.81 ± 0.16                          | 0.637                 |
| BUN, mmol/L/day                                                 | 13.5 ± 6.1                        | 14.4 ± 6.8                           | 0.028                 |
| Serum creatinine, µmol/L/day                                    | 172.9 ± 84.9                      | 203.0 ± 112.3                        | < 0.001               |
| Dialysate and replacement fluid, mL/h                           | 1991.8 ± 649.2                    | 1983.3 ± 674.7                       | 0.828                 |
| Dose of effluent, mL/h/day                                      | 2097.6 ± 634.0                    | 2065.5 ± 648.5                       | 0.399                 |
| Fluid balance excluding NUF volume                              |                                   |                                      |                       |
| At day 1, mL                                                    | 1233.2 ± 1756.4                   | 1695.3 ± 2414.6                      | < 0.001               |
| Daily, mL/d*                                                    | 1525.3 ± 1343.3                   | 1611.8 ± 1473.7                      | 0.251                 |
| Cumulative at the end of treatment days, mL*                    | 9936.7 ± 13924.5                  | 9811.3 ± 13961.5                     | 0.866                 |
| Fluid balance including NUF volume                              |                                   |                                      |                       |
| At day 1, mL                                                    | 272.7 ± 2038.9                    | 1028.0 ± 2553.4                      | < 0.001               |
| Daily, mL/d*                                                    | -417.5 ± 1693.5                   | 59.0 ± 1753.5                        | < 0.001               |
| Cumulative at the end of treatment days, mL*                    | -3842.3 ± 11481.7                 | -1402.0 ± 8939.0                     | < 0.001               |
| Total non–CRRT fluids <sup>a</sup>                              |                                   |                                      |                       |
| At day 1, mL                                                    | 1924.8 ± 1863.5                   | 2372.8 ± 2541.6                      | < 0.001               |
| Daily, mL/d*                                                    | 2420.4 ± 1423.8                   | 2589.1 ± 1549.2                      | 0.034                 |
| Cumulative at the end of treatment days, mL*                    | 15044.6 ± 17796.0                 | 15058.4 ± 17800.6                    | 0.988                 |
| Total non–CRRT IV fluids <sup>b</sup>                           |                                   |                                      |                       |
| At day 1, mL                                                    | 1811.7 ± 1779.1                   | 2273.8 ± 2480.8                      | < 0.001               |
| Daily, mL/d*                                                    | 2228.8 ± 1316.9                   | 2400.3 ± 1468.7                      | 0.022                 |
| Cumulative at the end of treatment days, mL*                    | 13573.6 ± 15572.3                 | 13773.1 ± 16018.3                    | 0.813                 |
| Enteral nutrition                                               |                                   |                                      |                       |
| At day 1, mL                                                    | 255.6 ± 508.3                     | 250.3 ± 584.5                        | 0.906                 |
| Daily, mL/d*                                                    | 331.5 ± 511.4                     | 366.8 ± 555.6                        | 0.299                 |
| Cumulative at the end of treatment days, mL*                    | 2040.7 ± 4522.9                   | 1876.3 ± 3372.7                      | 0.510                 |
| Urine output                                                    |                                   |                                      |                       |
| At day 1, mL                                                    | 406.8 ± 649.9                     | 396.9 ± 683.5                        | 0.780                 |
| Daily, mL/d*                                                    | 533.2 ± 611.1                     | 600.5 ± 702.7                        | 0.057                 |

**eTable 4 – Characteristics of Study Treatment According to Each Clinical Subgroup**

|                                              | <b>Edema<br/>(<i>n</i> = 634)</b> | <b>No Edema<br/>(<i>n</i> = 800)</b> | <b><i>p</i> value</b> |
|----------------------------------------------|-----------------------------------|--------------------------------------|-----------------------|
| Cumulative at the end of treatment days, mL* | 2681.9 ± 3244.5                   | 2848.6 ± 3706.3                      | 0.372                 |
| Blood losses <sup>c</sup>                    |                                   |                                      |                       |
| At day 1, mL                                 | 50.3 ± 225.2                      | 43.6 ± 229.5                         | 0.582                 |
| Daily, mL/d*                                 | 61.5 ± 276.5                      | 45.5 ± 219.7                         | 0.221                 |
| Cumulative at the end of treatment days, mL* | 339.8 ± 1589.8                    | 313.2 ± 1463.2                       | 0.742                 |
| Other output <sup>d</sup>                    |                                   |                                      |                       |
| At day 1, mL                                 | 241.1 ± 556.8                     | 239.9 ± 614.8                        | 0.970                 |
| Daily, mL/d*                                 | 302.8 ± 499.4                     | 331.8 ± 546.1                        | 0.300                 |
| Cumulative at the end of treatment days, mL* | 2101.5 ± 4606.6                   | 2097.4 ± 4417.2                      | 0.986                 |
| Filters used daily                           | 0.9 ± 0.5                         | 0.9 ± 0.5                            | 0.892                 |
| Patients treated with IHD in ICU             | 52 (8.2)                          | 54 (6.8)                             | 0.346                 |

Data are mean ± standard deviation or No (%)  
BUN: blood urea nitrogen; ICU: intensive care unit; IHD: intermittent hemodialysis; IV: intravenous  
\* considering only days where continuous renal replacement therapy was used  
<sup>a</sup> considering blood, blood products, albumin, enteral nutrition, total parenteral nutrition and other intravenous fluids  
<sup>b</sup> considering blood, blood products, albumin, total parenteral nutrition and other intravenous fluids  
<sup>c</sup> considering any blood loss in and outside the ICU  
<sup>d</sup> other fluid losses (e.g., gastrointestinal losses, drain losses and other)



**eTable 5 – Summary of Posterior Distributions for Heterogeneity of Effect in Each Clinical Subgroup**

| Subgroup                                                           | Mean   | SD    | Q <sub>2.5</sub> | Q <sub>25</sub> | Median | Q <sub>75</sub> | Q <sub>97.5</sub> | Prob<br>OR > 1.0 | Prob<br>OR > 1.2 |
|--------------------------------------------------------------------|--------|-------|------------------|-----------------|--------|-----------------|-------------------|------------------|------------------|
| <b>NUF Rate &gt; 1.75 mL/kg/h vs. NUF rate &lt; 1.01 mL/kg/h</b>   |        |       |                  |                 |        |                 |                   |                  |                  |
| Edema                                                              | 0.042  | 0.196 | -0.343           | -0.091          | 0.042  | 0.175           | 0.424             | 0.854            | 0.237            |
| No edema                                                           | 0.193  | 0.176 | -0.152           | 0.074           | 0.194  | 0.313           | 0.537             | 0.863            | 0.524            |
| <b>NUF Rate &gt; 1.75 mL/kg/h vs. NUF Rate 1.01 – 1.75 mL/kg/h</b> |        |       |                  |                 |        |                 |                   |                  |                  |
| Edema                                                              | 0.447  | 0.188 | 0.075            | 0.322           | 0.447  | 0.574           | 0.816             | 0.991            | 0.920            |
| No edema                                                           | 0.347  | 0.182 | -0.013           | 0.226           | 0.348  | 0.469           | 0.705             | 0.971            | 0.817            |
| <b>NUF Rate 1.01 – 1.75 mL/kg/h vs. NUF Rate &lt; 1.01 mL/kg/h</b> |        |       |                  |                 |        |                 |                   |                  |                  |
| Edema                                                              | -0.403 | 0.209 | -0.816           | -0.544          | -0.402 | -0.261          | 0.001             | 0.025            | 0.003            |
| No edema                                                           | -0.152 | 0.168 | -0.482           | -0.265          | -0.153 | -0.038          | 0.179             | 0.185            | 0.023            |

*SD: standard deviation*

**eTable 6 – Results of the Bayesian Regression Model**

|                                    | Estimate | SE    | Lower 95% CrI | Upper 95% CrI | Rhat* |
|------------------------------------|----------|-------|---------------|---------------|-------|
| Intercept                          | -2.222   | 0.493 | -3.203        | -1.265        | 1.000 |
| Cluster 2                          | -0.121   | 0.413 | -0.935        | 0.689         | 1.000 |
| Cardiovascular SOFA                | 0.101    | 0.114 | -0.124        | 0.325         | 1.000 |
| NUF rate group                     |          |       |               |               |       |
| Middle                             | -0.162   | 0.488 | -1.123        | 0.790         | 1.000 |
| High                               | 0.114    | 0.460 | -0.792        | 1.021         | 1.000 |
| APACHE–III                         | 0.017    | 0.002 | 0.012         | 0.022         | 1.000 |
| Higher–intensity group             | 0.033    | 0.113 | -0.187        | 0.255         | 1.000 |
| Cluster 2 : Cardiovascular SOFA    | -0.166   | 0.104 | -0.369        | 0.037         | 1.000 |
| Cardiovascular SOFA : Middle group | -0.075   | 0.127 | -0.324        | 0.173         | 1.000 |
| Cardiovascular SOFA : High group   | -0.013   | 0.119 | -0.246        | 0.221         | 1.000 |
| Cluster 2 : Middle group           | 0.054    | 0.405 | -0.748        | 0.842         | 1.000 |
| Cluster 2 : High group             | -0.076   | 0.386 | -0.839        | 0.677         | 1.000 |

APACHE: Acute Physiology and Chronic Health Evaluation; SOFA: Sequential Organ Failure Assessment; SE: standard error; CrI: credible interval

\* Gelman Rubin statistic to check Markov chains for convergence

**eTable 7 – Results of the Bayesian Regression Model**

|                                    | Estimate | SE    | Lower 95% CrI | Upper 95% CrI | Rhat* |
|------------------------------------|----------|-------|---------------|---------------|-------|
| Intercept                          | -2.476   | 0.339 | -3.149        | -1.817        | 1.000 |
| Edema                              | -0.003   | 0.300 | -0.597        | 0.583         | 1.000 |
| Cardiovascular SOFA                | 0.076    | 0.072 | -0.063        | 0.218         | 1.000 |
| NUF rate group                     |          |       |               |               |       |
| Middle                             | -0.006   | 0.321 | -0.636        | 0.625         | 1.000 |
| High                               | 0.118    | 0.318 | -0.502        | 0.736         | 1.000 |
| APACHE–III                         | 0.018    | 0.002 | 0.013         | 0.023         | 1.000 |
| Higher–intensity group             | 0.028    | 0.112 | -0.192        | 0.248         | 1.000 |
| Edema : Cardiovascular SOFA        | 0.081    | 0.075 | -0.065        | 0.230         | 1.000 |
| Cardiovascular SOFA : Middle group | -0.081   | 0.093 | -0.262        | 0.102         | 1.000 |
| Cardiovascular SOFA : High group   | -0.015   | 0.090 | -0.191        | 0.161         | 1.000 |
| Edema : Middle group               | -0.258   | 0.285 | -0.815        | 0.297         | 1.000 |
| Edema : High group                 | -0.059   | 0.280 | -0.607        | 0.486         | 1.000 |

APACHE: Acute Physiology and Chronic Health Evaluation; SOFA: Sequential Organ Failure Assessment; SE: standard error; CrI: credible interval

\* Gelman Rubin statistic to check Markov chains for convergence

**eFigure 1. Distributions of Imputed and Unimputed Values**

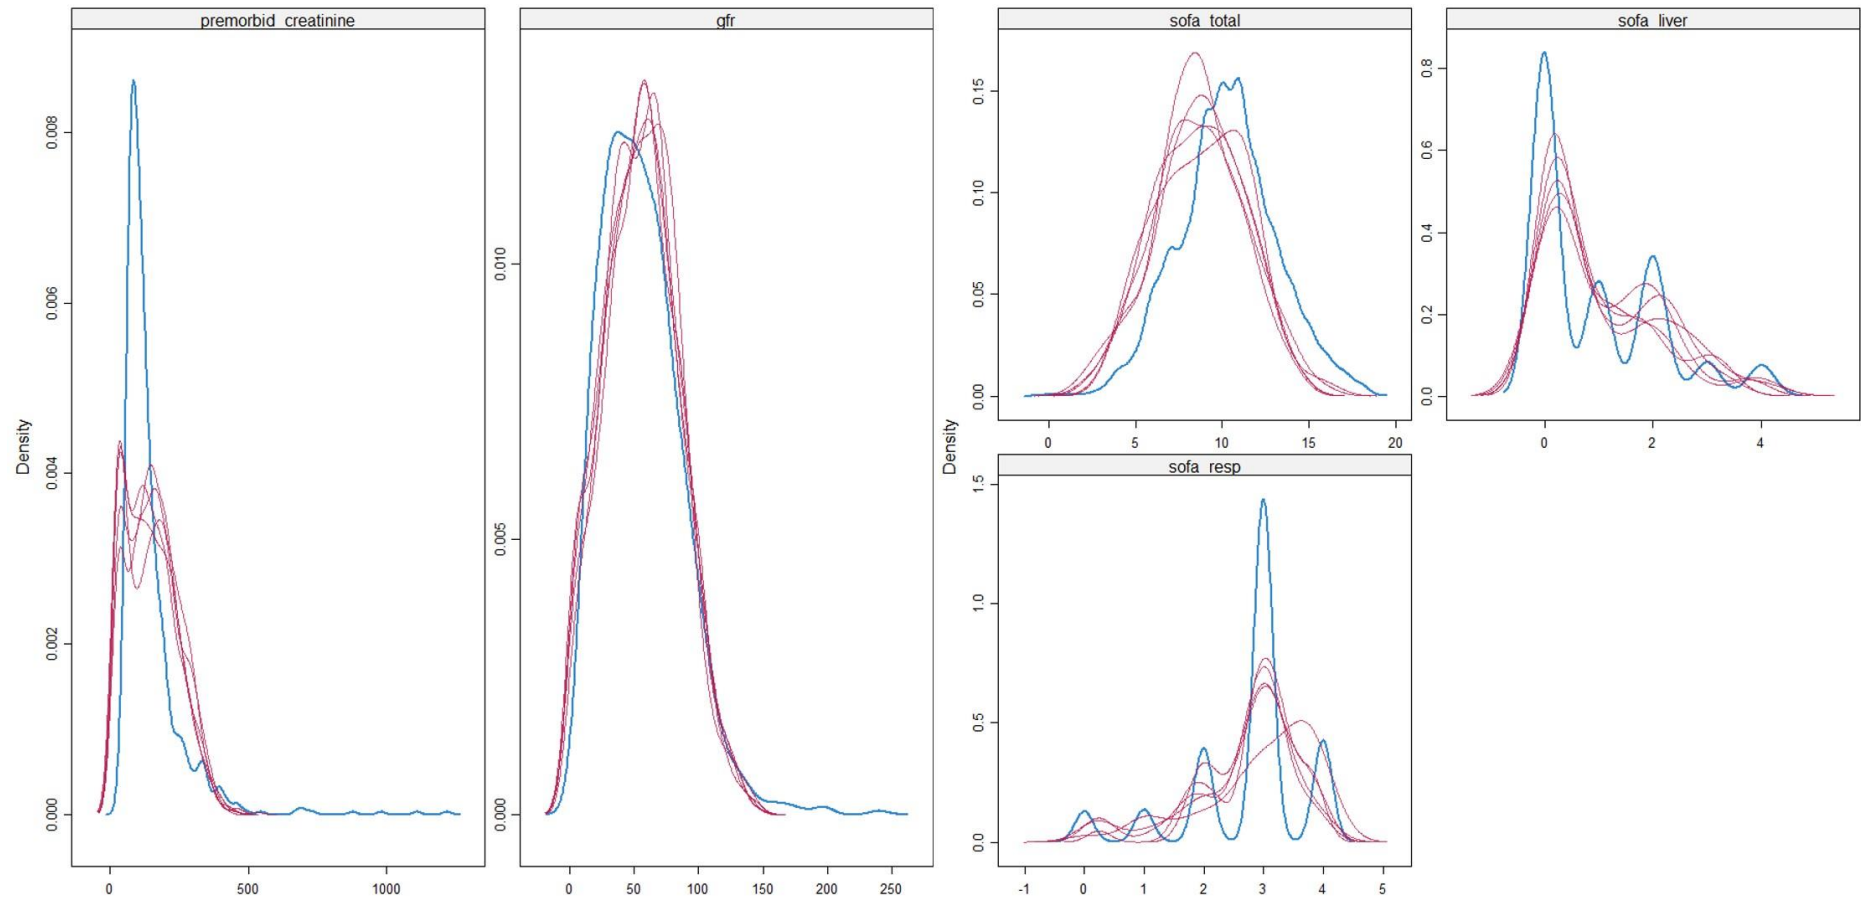

Figure showing distribution of imputed (red) and unimputed (blue) values.

**eFigure 2. Low (< 1.01 mL/kg/h), middle (1.01 – 1.75 mL/kg/h) and high (> 1.75 mL/kg/h) groups of NUF rate mortality according to A) baseline characteristics, B) quintiles of fluid balance at day 1, C) quintiles of modified SOFA, D) quintiles of eGFR, E) quintiles of APACHE–III, and F) cardiovascular SOFA**

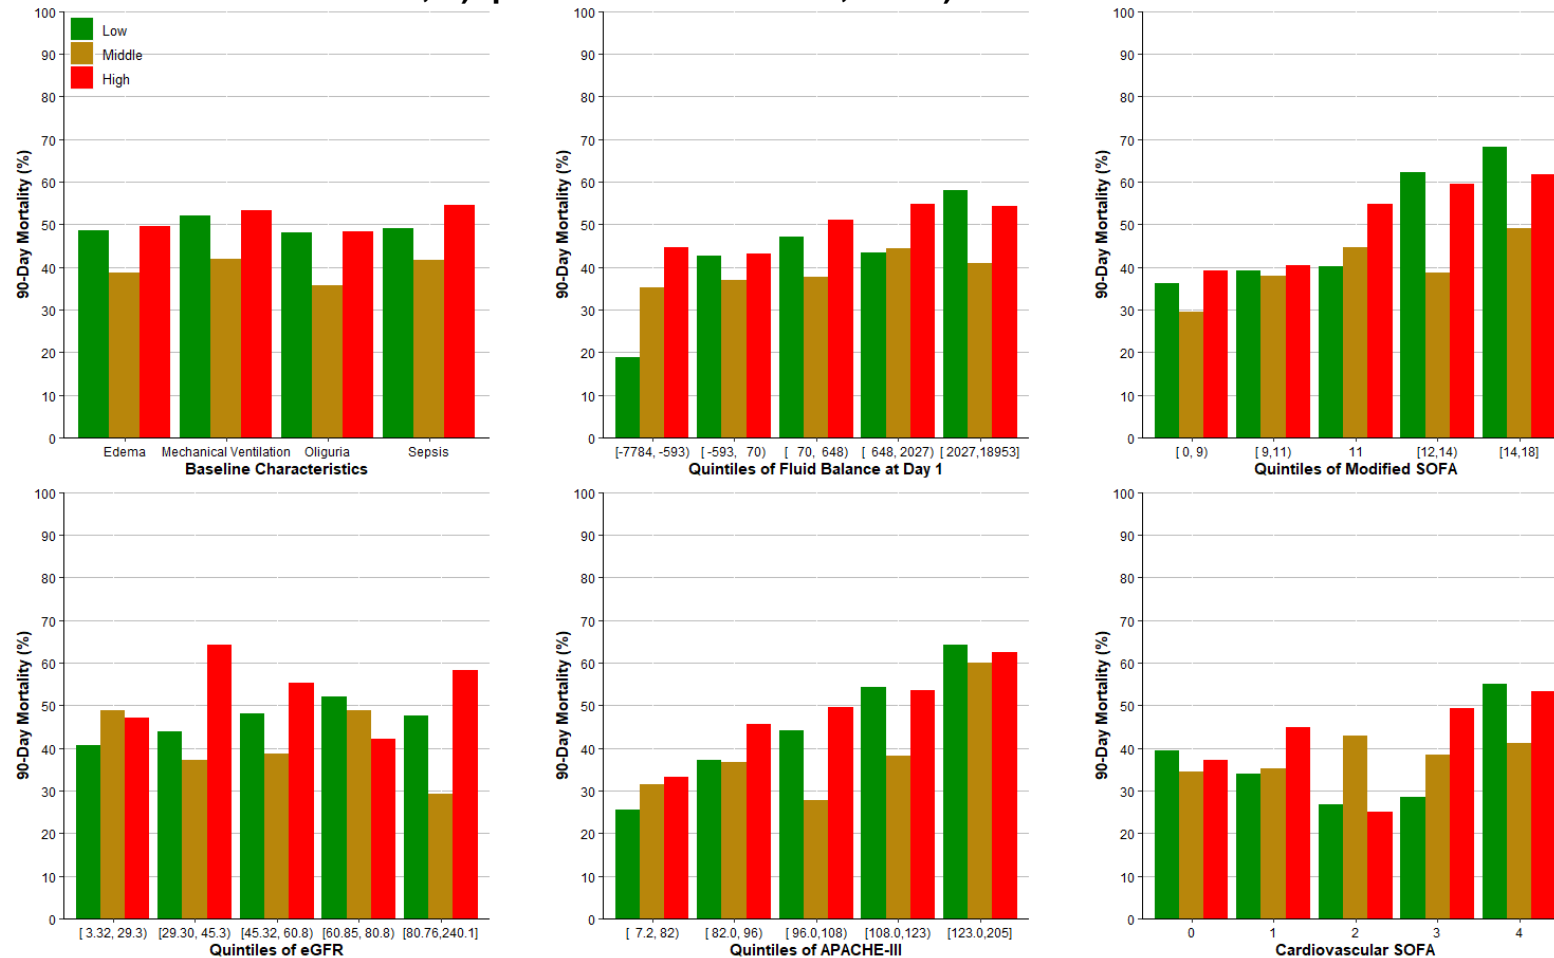

Modified SOFA calculated not considering the neurological component

SOFA: Sequential Organ Failure Assessment; eGFR: estimated glomerular filtration rate; APACHE: Acute Physiology and Chronic Health Evaluation

**eFigure 3. Optimal number of clusters according to the silhouette method**

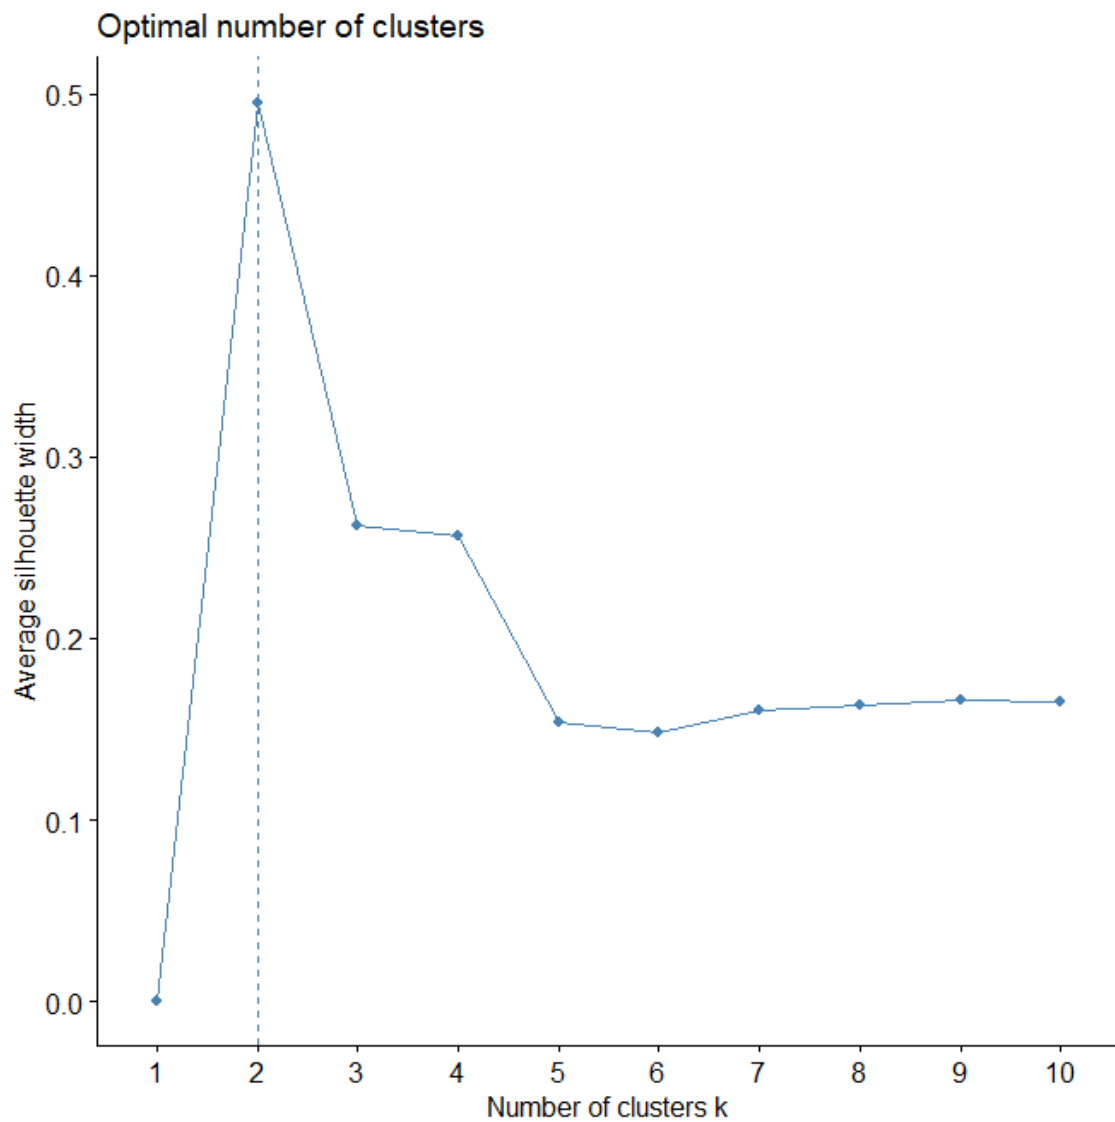

This method computes partitioning around medoids (PAM) algorithm using different values of clusters  $k$ . Next, the average clusters silhouette is drawn according to the number of clusters. The average silhouette measures the quality of a clustering. A high average silhouette width indicates a good clustering. The optimal number of clusters  $k$  is the one that maximizes the average silhouette over a range of possible values for  $k$ .

**eFigure 4. Prediction strength according to *kamila* algorithm for different number of simulated clusters after cross-validation**

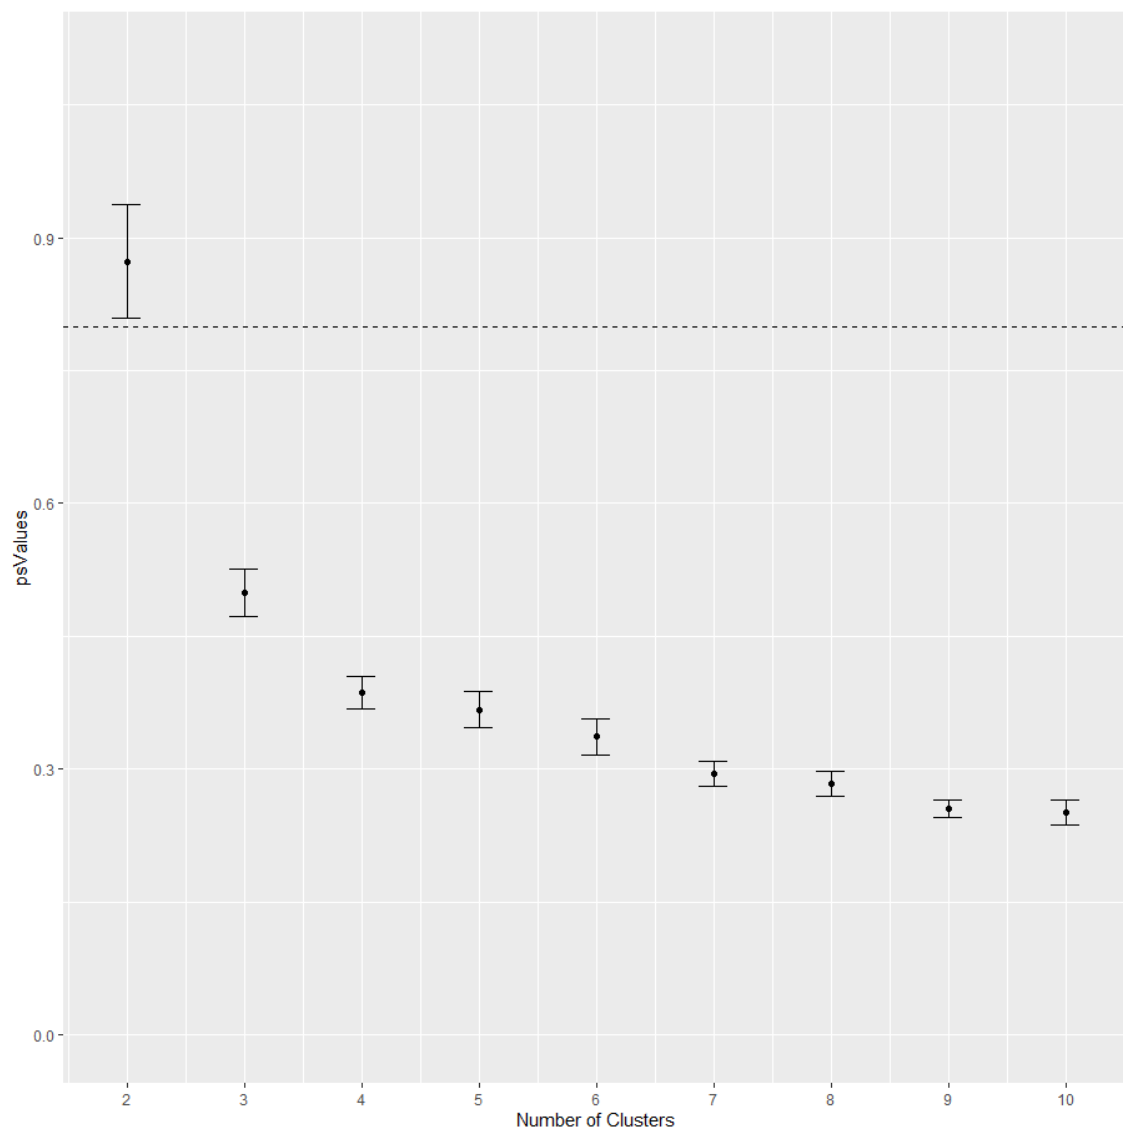

Two clusters provided the highest prediction strength values (psValues) and this value is higher than the prediction strength threshold.

**eFigure 5. tSNE Plot**

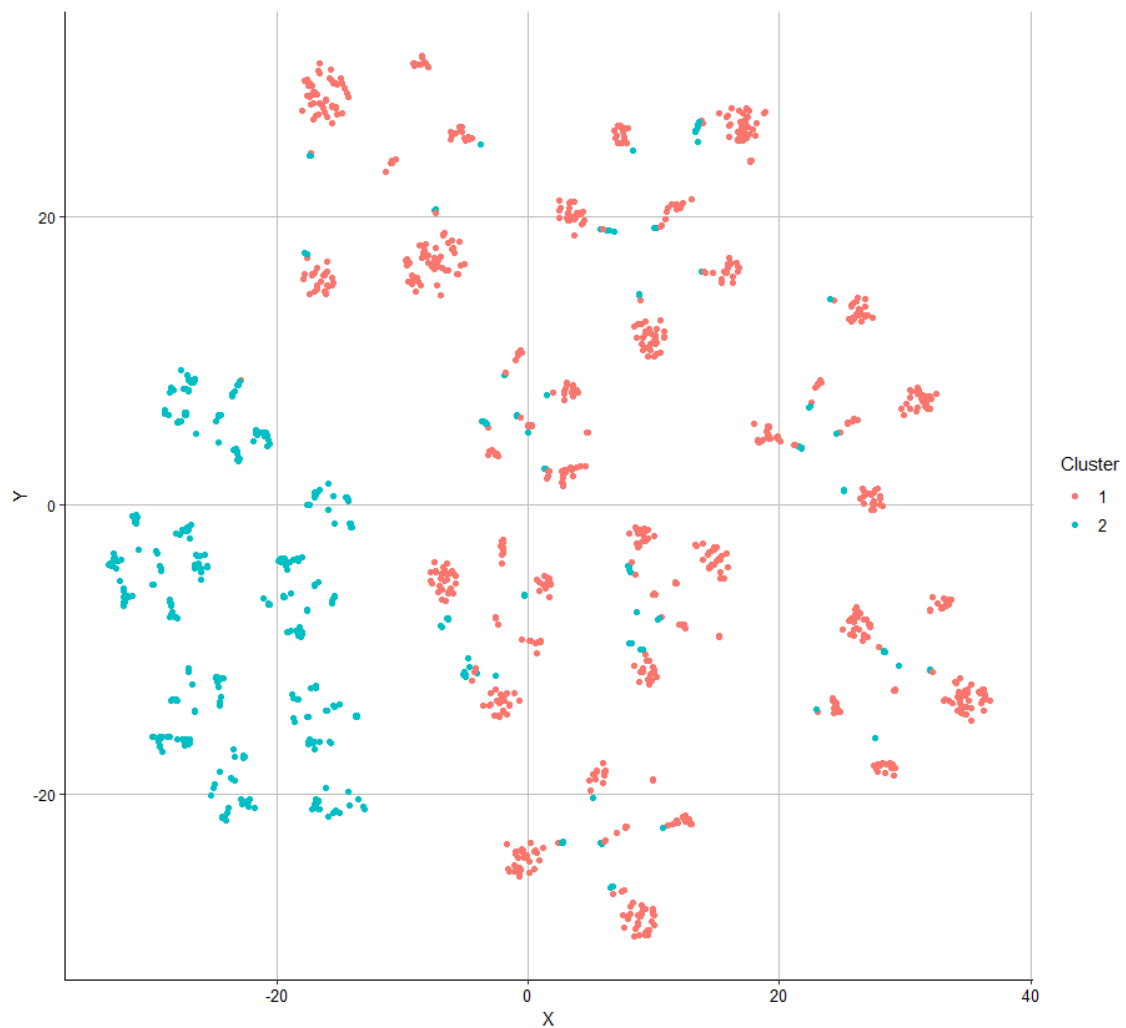

tSNE plot using Gower's distance with colors based on clusters found by *kamila* algorithm. Although some overlap between clusters based on Gower's distance is seen, there is a considerable difference between the two clusters found by *kamila*.

*kamila* is an iterative clustering method that equitably balances the contribution of continuous and categorical variables. Gower Distance is a distance measure that can be used to calculate the distance between two entities whose attributes have a mix of categorical and numerical values.



**eFigure 6. Probability that the effect size is lower in cluster 2 than in cluster 1**

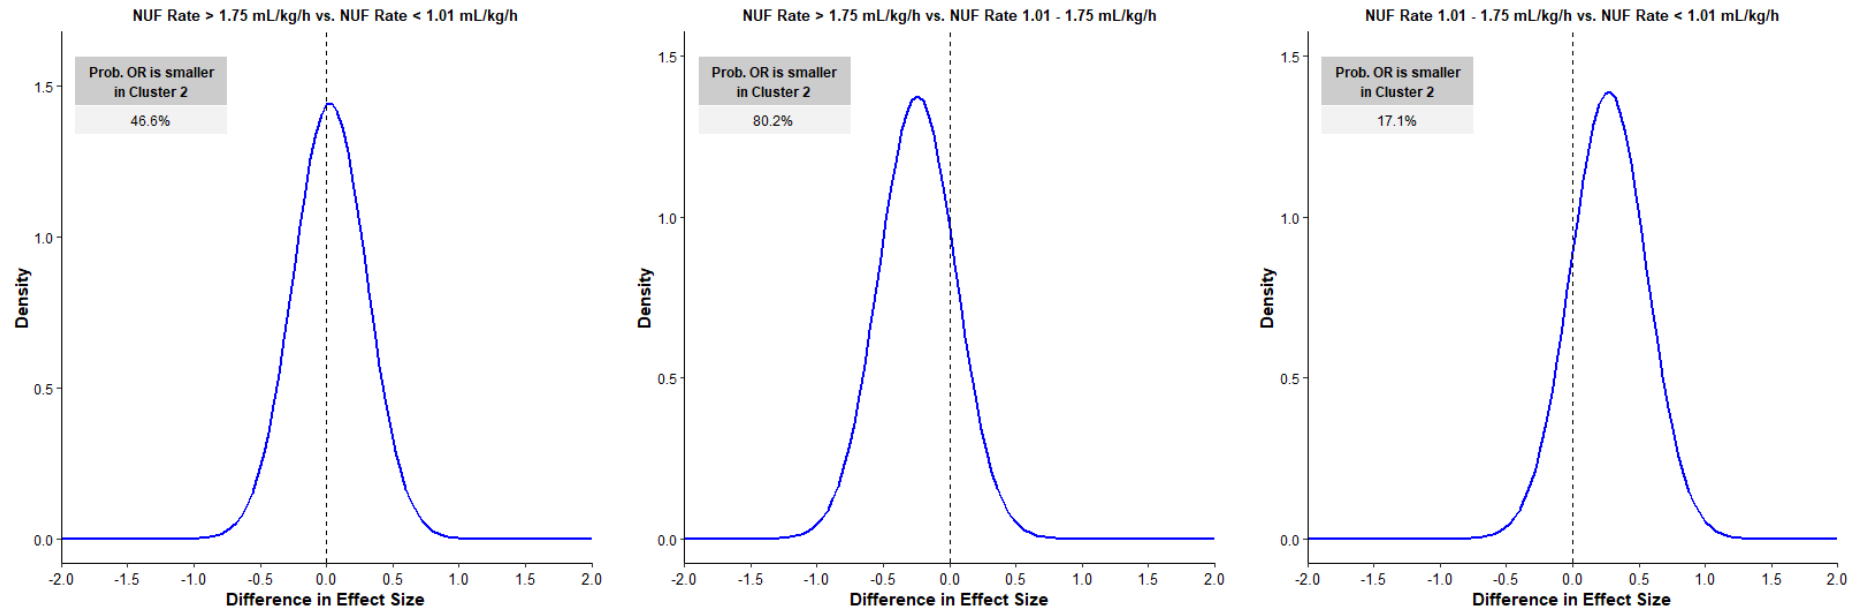

This is the probability that the odds ratio is lower in cluster 2 compared to cluster 1. It is calculated from the difference in the odds ratio in cluster 2 *minus* the odds ratio in cluster 1  
*OR: odds ratio*

**eFigure 7. Bayesian heterogeneity of effect in the pairwise comparisons of A) high vs. low, B) high vs. middle, and C) middle vs. low NUF rate tertiles**

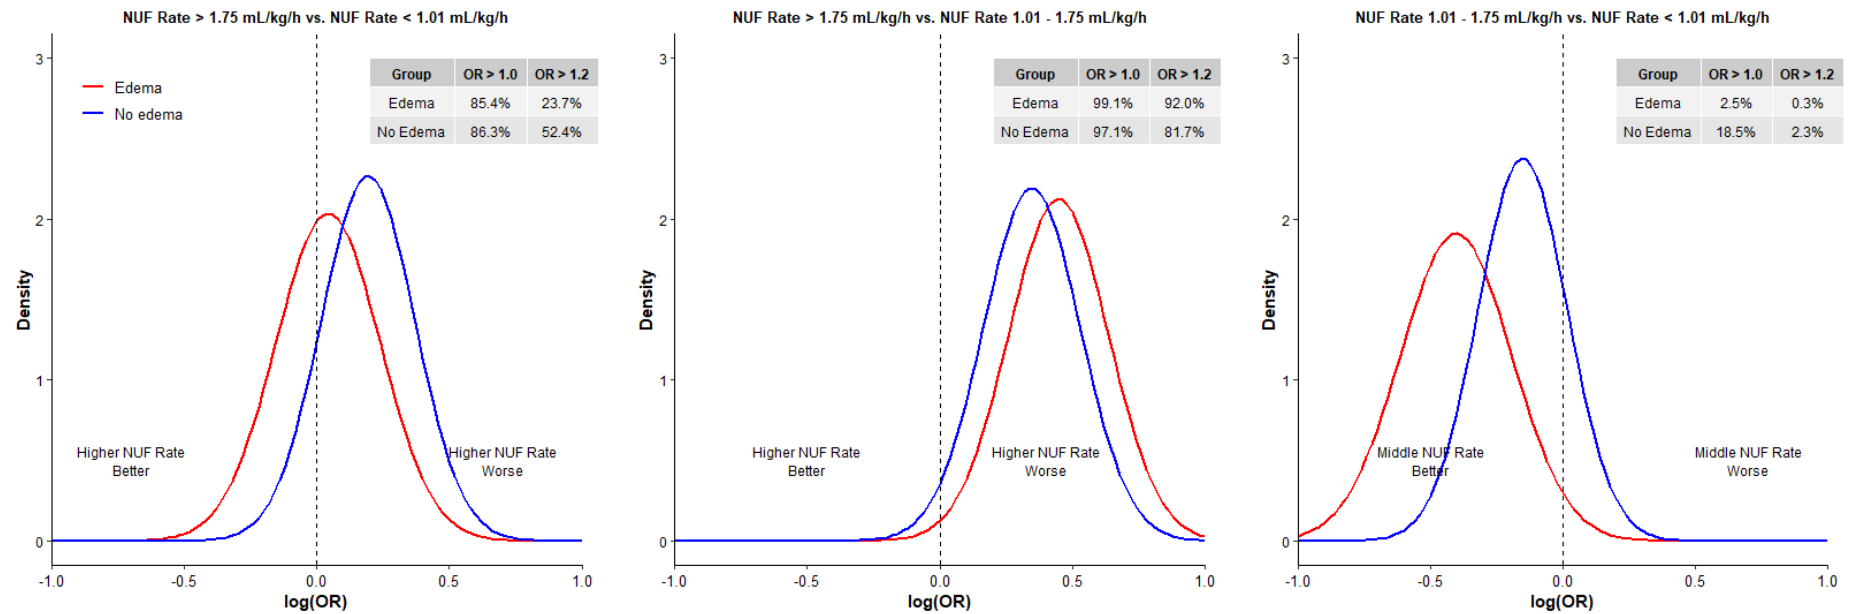

Posterior probability distribution of the NUF rate groups treatment effect ( $\log(\text{OR})$ ) in each cluster. The tables contain the probability that the odds ratio for 90-day mortality in the high NUF group (plot A and B) or in the middle NUF group (plot C) is above 1.0 or 1.2 for each cluster found.

NUF: net ultrafiltration; OR: odds ratio

**eFigure 8. Bayesian heterogeneity of effect in the pairwise comparisons of A) high vs. low, B) high vs. middle, and C) middle vs. low NUF rate tertiles**

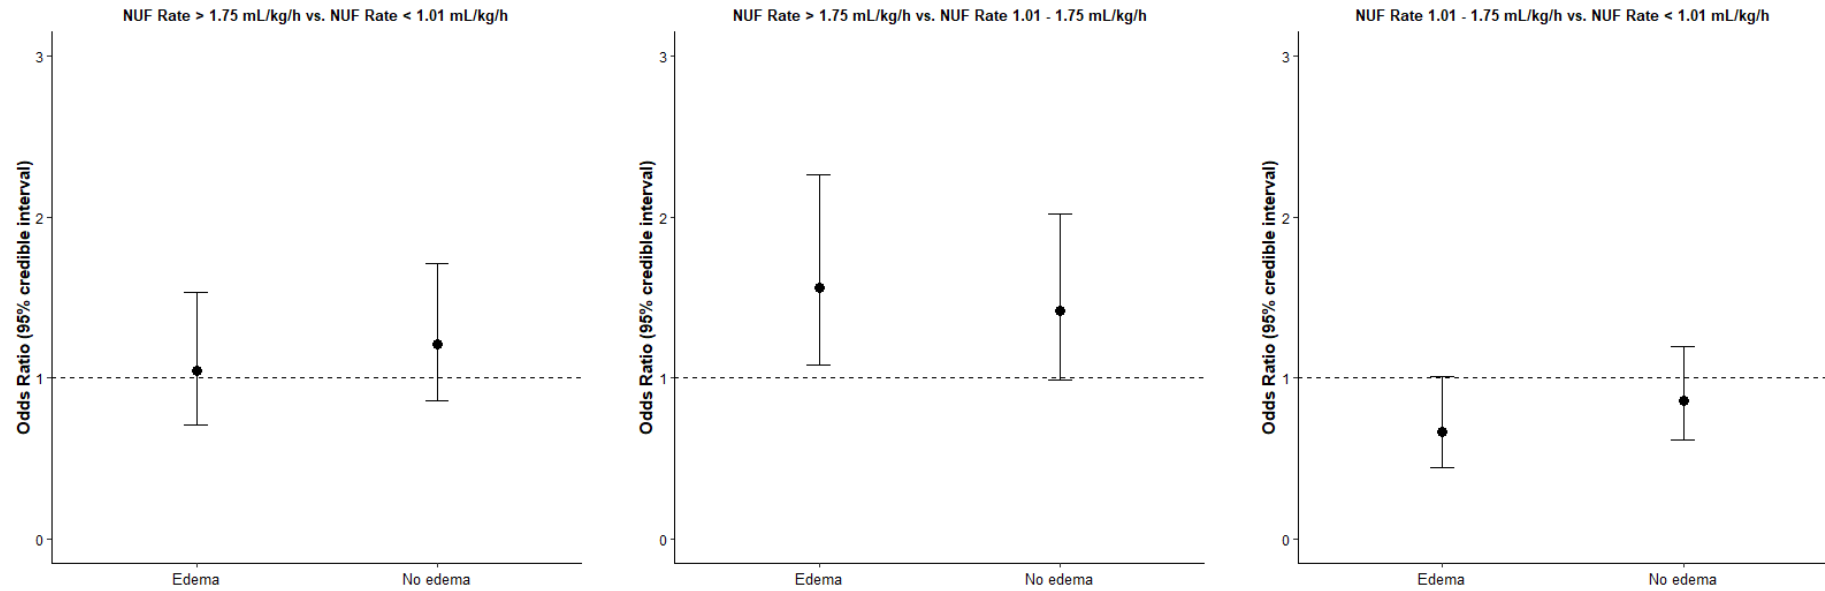

Odds ratio (95% credible intervals) for the association between the high NUF group (plot A and B) or the middle NUF group (plot C) and 90-day mortality according to the clusters found.  
*NUF: net ultrafiltration*

**eFigure 9. Probability that the effect size is lower in the subgroup of No edema in the subgroup of Edema**

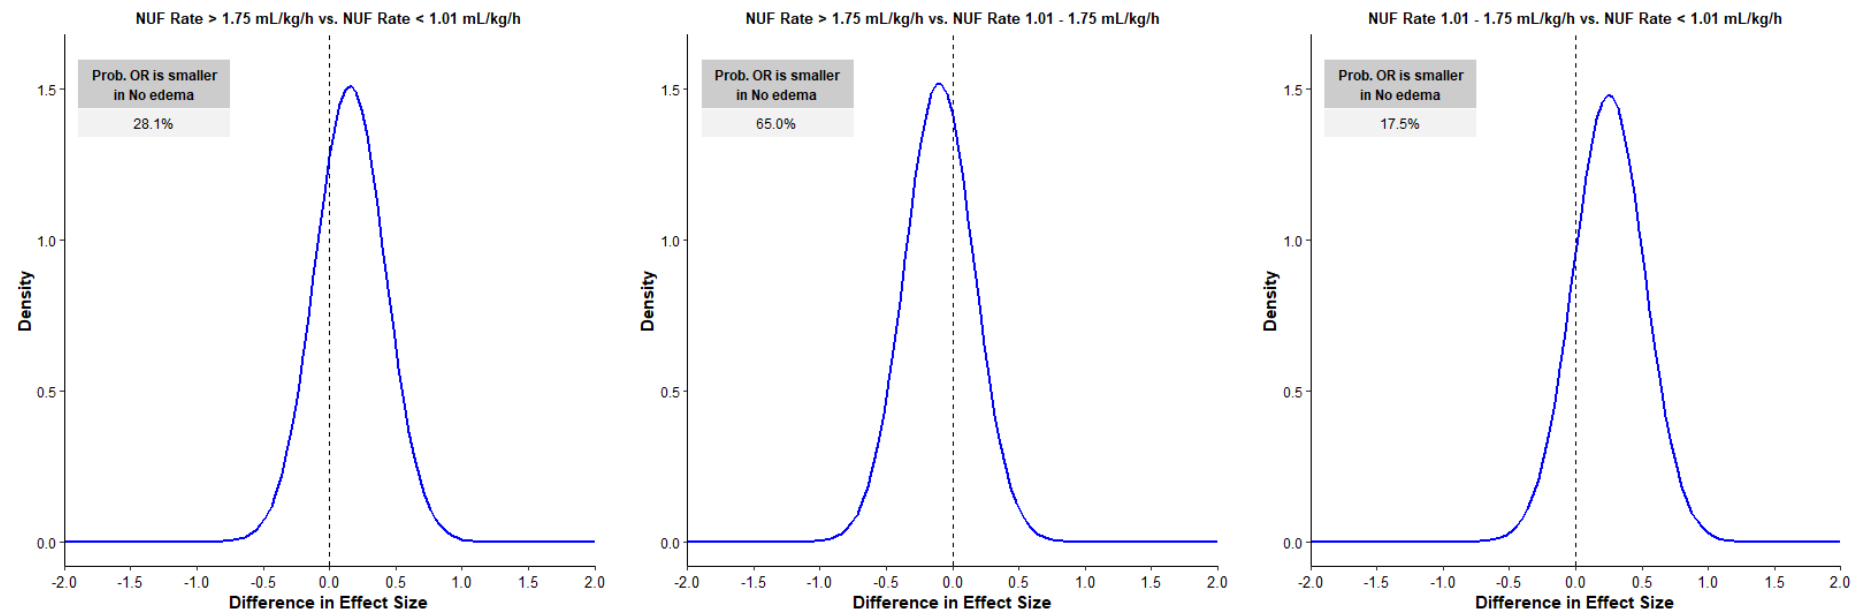

This is the probability that the odds ratio is lower in 'No edema' compared to 'Edema'. It is calculated from the difference in the odds ratio in 'No edema' *minus* the odds ratio in 'Edema';  
*OR: odds ratio*

**eFigure 10. Predicted mortality probability in different scenarios in the clusters**

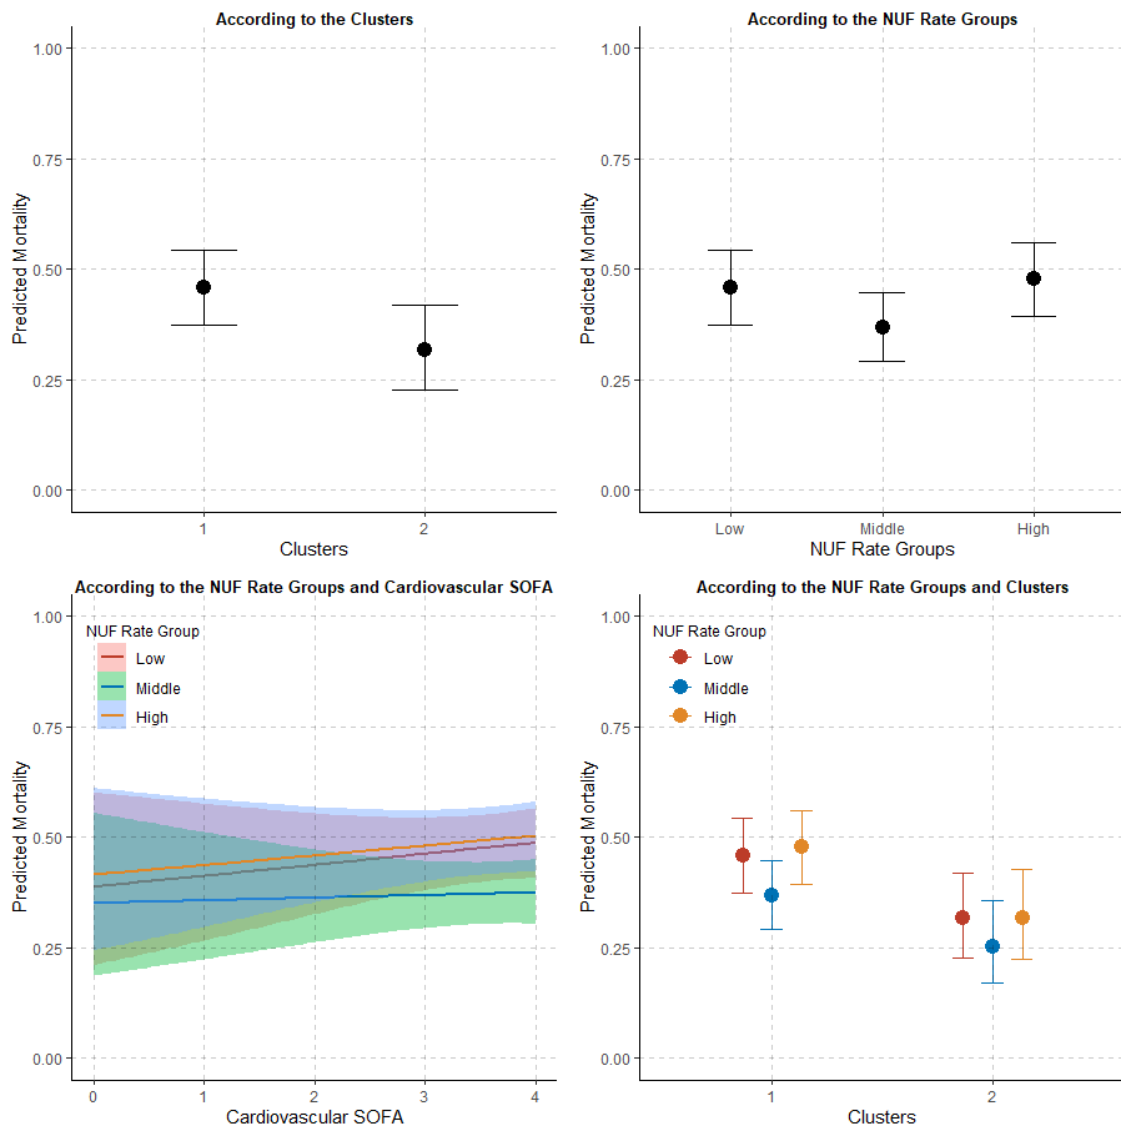

Predicted mortality extracted from a Bayesian multi-level model with a Bernoulli distribution, with centres as random effect and considering non-informative priors. All models were adjusted by APACHE-III and treatment allocation in the original trial and considered interactions between cardiovascular SOFA and NUF rate groups, cluster and NUF rate groups, and cluster and cardiovascular SOFA.

*NUF: net ultrafiltration; SOFA: Sequential Organ Failure Assessment*

**eFigure 11. Predicted mortality probability in different scenarios in the clinical subgroups**

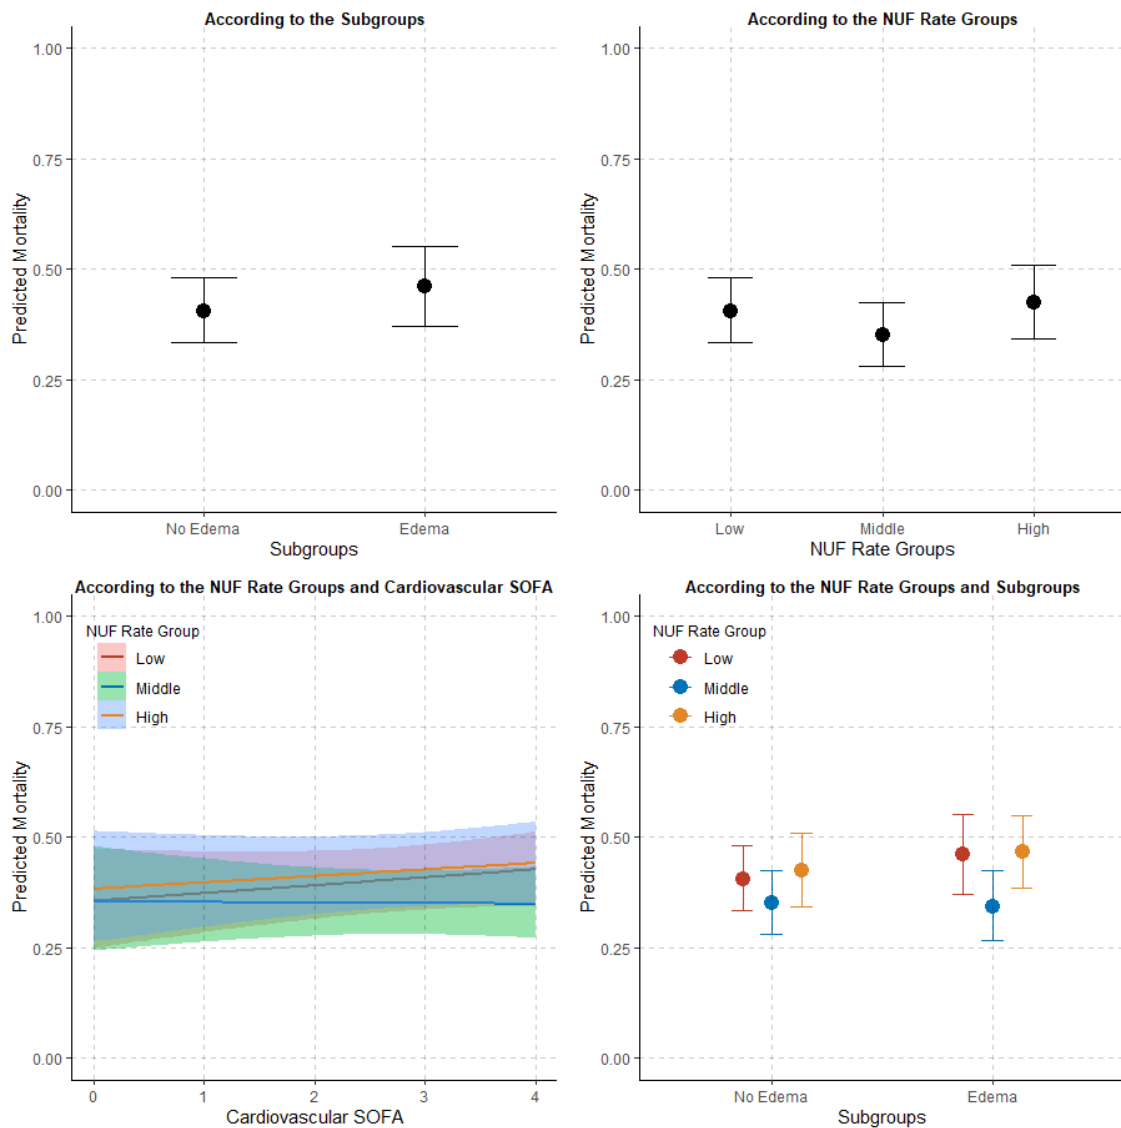

Predicted mortality extracted from a Bayesian multi-level model with a Bernoulli distribution, with centres as random effect and considering non-informative priors. All models were adjusted by APACHE-III and treatment allocation in the original trial and considered interactions between cardiovascular SOFA and NUF rate groups, clinical subgroups and NUF rate groups, and clinical subgroups and cardiovascular SOFA.

*NUF: net ultrafiltration; SOFA: Sequential Organ Failure Assessment*

**eFigure 12. Odds ratio for 90-day mortality with 95% credible interval according to NUF rate groups and the clinical subgroups**

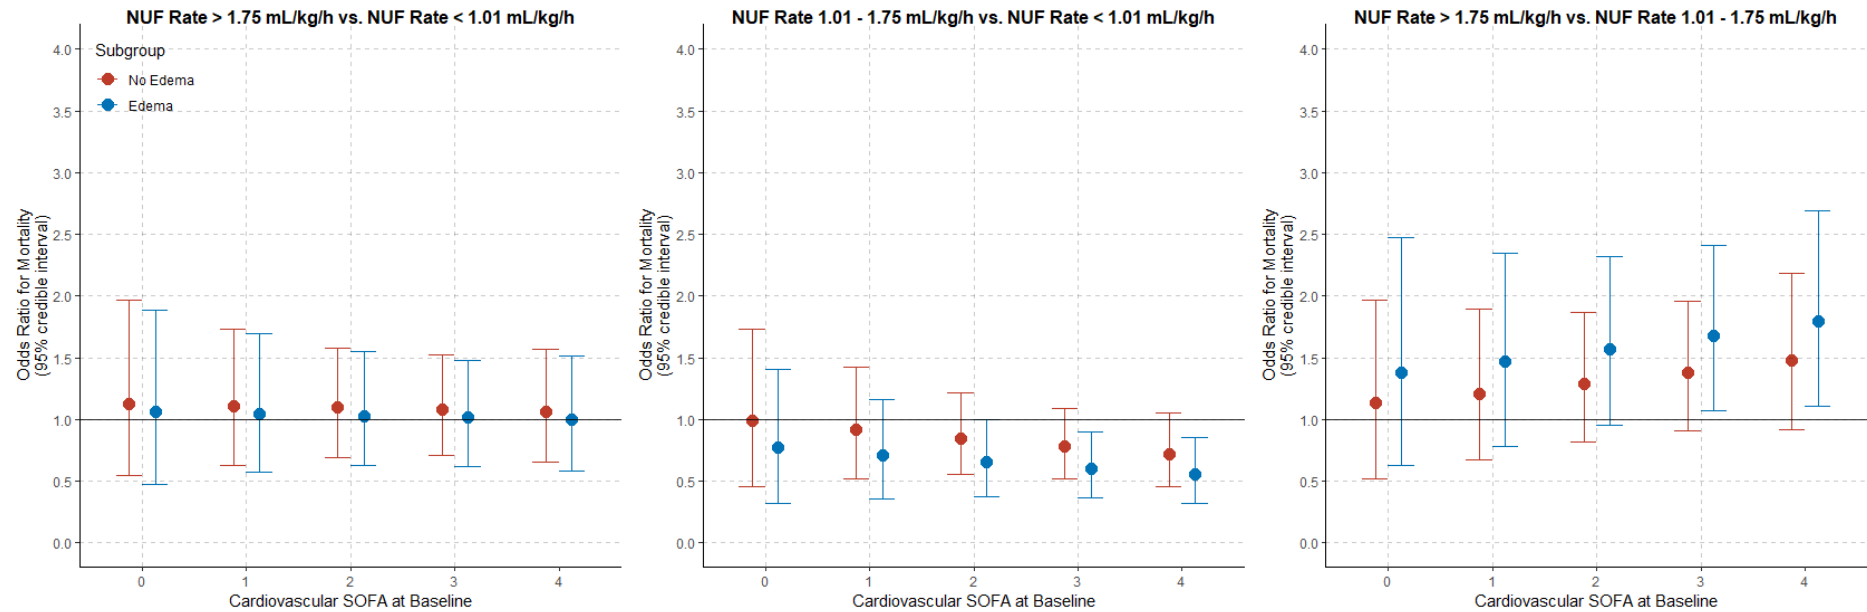

Bayesian multi-level model with a Bernoulli distribution, with centres as random effect and considering non-informative priors. All models were adjusted by APACHE-III and treatment allocation in the original trial and considered interactions between cardiovascular SOFA and NUF rate groups, clinical subgroups and NUF rate groups, and clinical subgroups and cardiovascular SOFA. Odds ratio extracted from the median of the posterior distribution and 95% credible intervals calculated as the highest posterior density.

NUF: net ultrafiltration; SOFA: Sequential Organ Failure Assessment

**eFigure 13. Odds ratio for 90-day mortality with 95% credible interval according to NUF rate groups and the clusters further adjusted by total non-CRRT intravenous fluids**

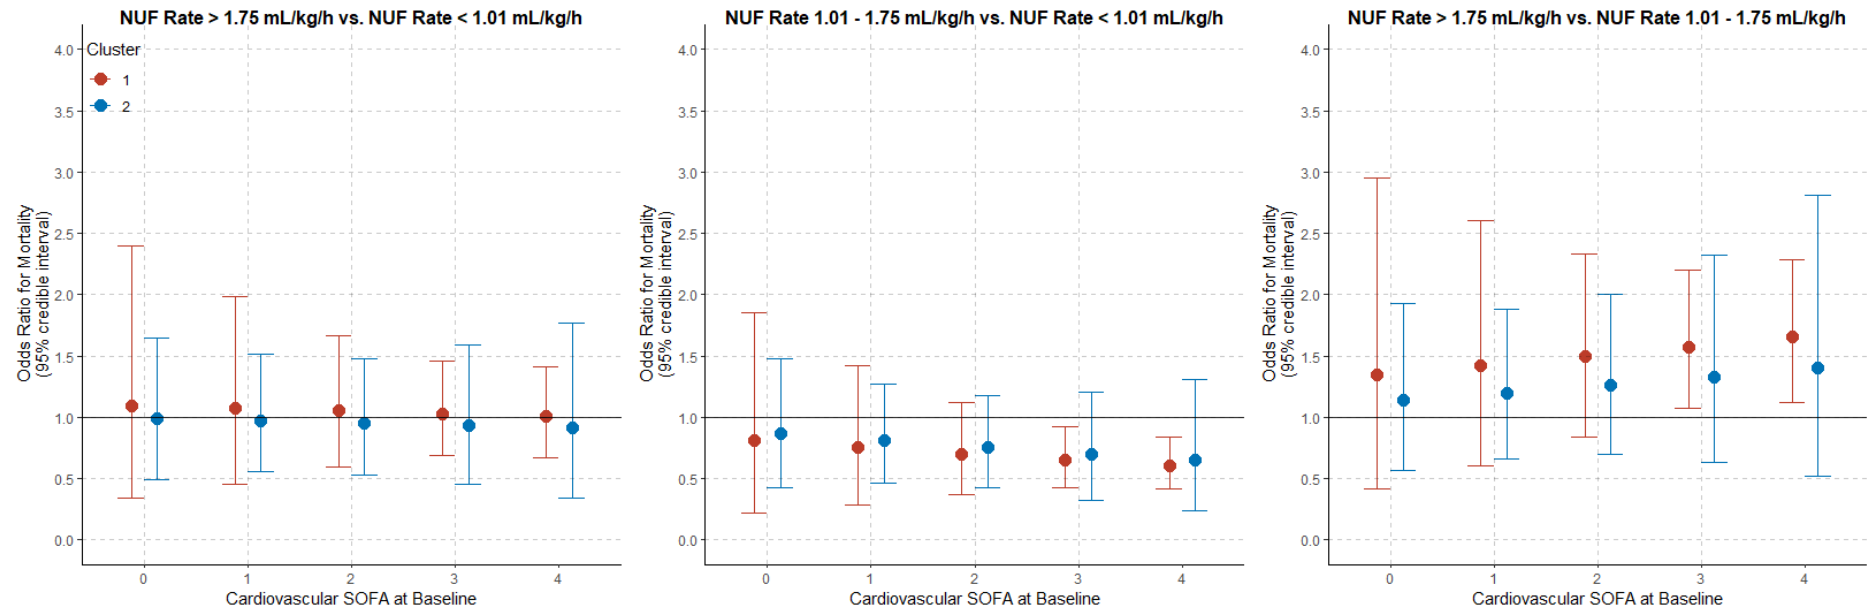

Bayesian multi-level model with a Bernoulli distribution, with centres as random effect and considering non-informative priors. All models were adjusted by APACHE-III, total non-CRRT intravenous fluids (defined as blood, blood products, albumin, total parenteral nutrition and other intravenous fluids) and treatment allocation in the original trial and considered interactions between cardiovascular SOFA and NUF rate groups, cluster and NUF rate groups, and cluster and cardiovascular SOFA. Odds ratio extracted from the median of the posterior distribution and 95% credible intervals calculated as the highest posterior density.

*NUF: net ultrafiltration; SOFA: Sequential Organ Failure Assessment*



**eFigure 14. Odds ratio for 90-day mortality with 95% credible interval according to NUF rate groups and the clinical subgroups further adjusted by total non-CRRT intravenous fluids**

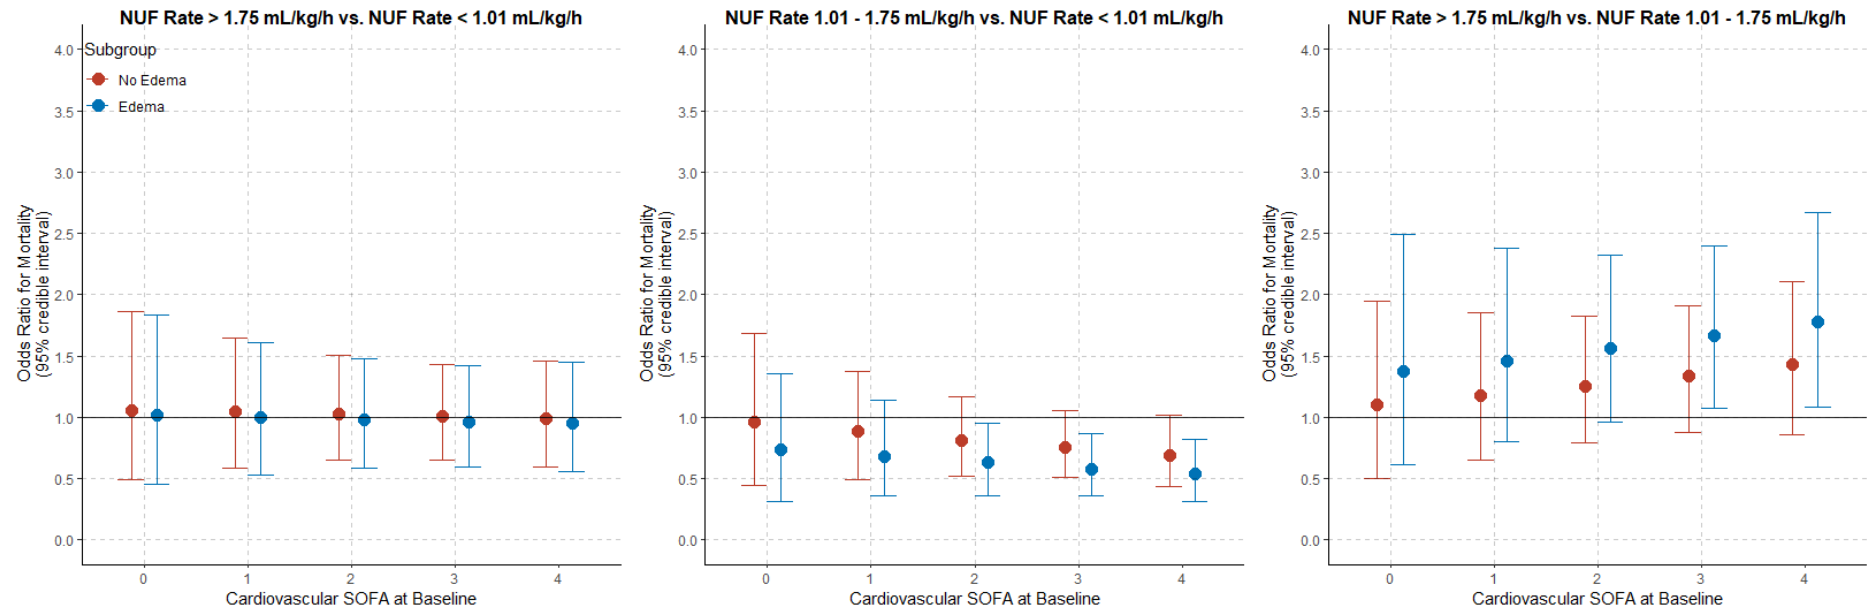

Bayesian multi-level model with a Bernoulli distribution, with centres as random effect and considering non-informative priors. All models were adjusted by APACHE-III, total non-CRRT intravenous fluids (defined as blood, blood products, albumin, total parenteral nutrition and other intravenous fluids) and treatment allocation in the original trial and considered interactions between cardiovascular SOFA and NUF rate groups, clinical subgroups and NUF rate groups, and clinical subgroups and cardiovascular SOFA. Odds ratio extracted from the median of the posterior distribution and 95% credible intervals calculated as the highest posterior density.  
 NUF: net ultrafiltration; SOFA: Sequential Organ Failure Assessment

**eFigure 15. Odds ratio for 90-day mortality with 95% credible interval according to NUF rate groups and the clusters further adjusted by total non-CRRT intravenous fluids**

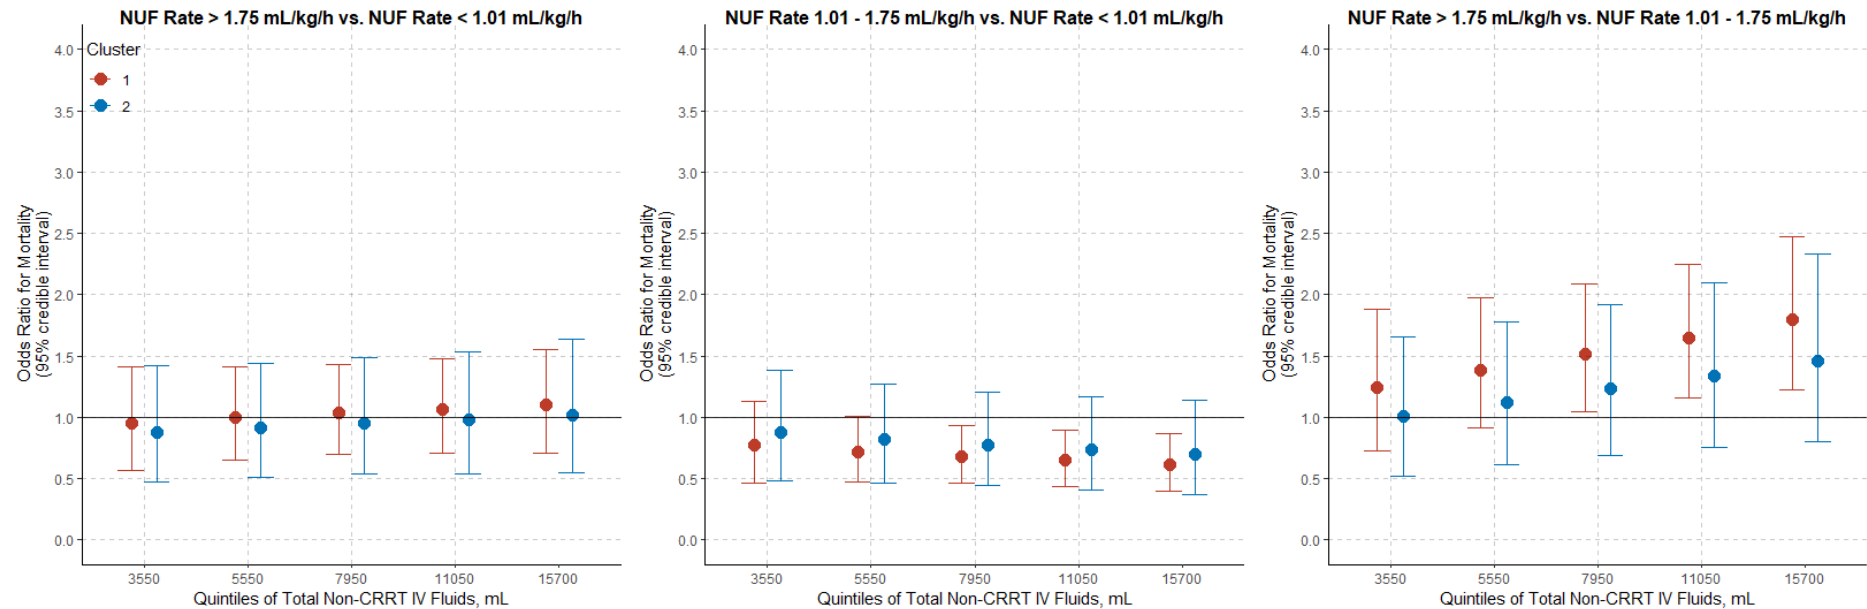

Bayesian multi-level model with a Bernoulli distribution, with centres as random effect and considering non-informative priors. All models were adjusted by APACHE-III and treatment allocation in the original trial and considered interactions between quintiles of total non-CRRT intravenous fluids (defined as blood, blood products, albumin, total parenteral nutrition and other intravenous fluids) and NUF rate groups, cluster and NUF rate groups, and cluster and quintiles of total non-CRRT intravenous fluids. Odds ratio extracted from the median of the posterior distribution and 95% credible intervals calculated as the highest posterior density.  
 NUF: net ultrafiltration; SOFA: Sequential Organ Failure Assessment

**eFigure 16. Odds ratio for 90-day mortality with 95% credible interval according to NUF rate groups and the clinical subgroups by total non-CRRT intravenous fluids**

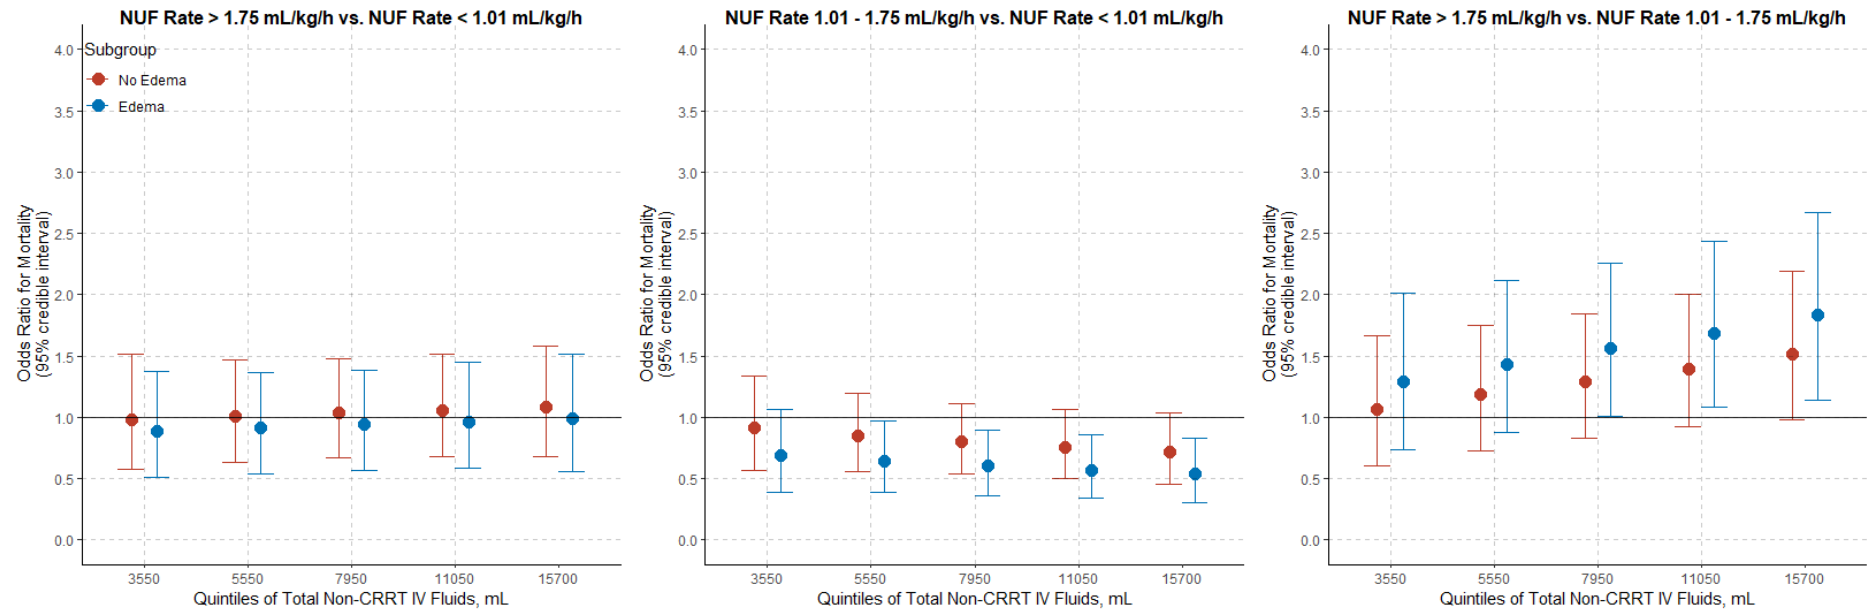

Bayesian multi-level model with a Bernoulli distribution, with centres as random effect and considering non-informative priors. All models were adjusted by APACHE-III and treatment allocation in the original trial and considered interactions between quintiles of total non-CRRT intravenous fluids (defined as blood, blood products, albumin, total parenteral nutrition and other intravenous fluids) and NUF rate groups, clinical subgroups and NUF rate groups, and clinical subgroups and quintiles of total non-CRRT intravenous fluids. Odds ratio extracted from the median of the posterior distribution and 95% credible intervals calculated as the highest posterior density.  
 NUF: net ultrafiltration; SOFA: Sequential Organ Failure Assessment

**eFigure 17. Cubic spline plot for predicted mortality according to NUF rate groups for all participants and the clinical subgroups by clusters and edema**

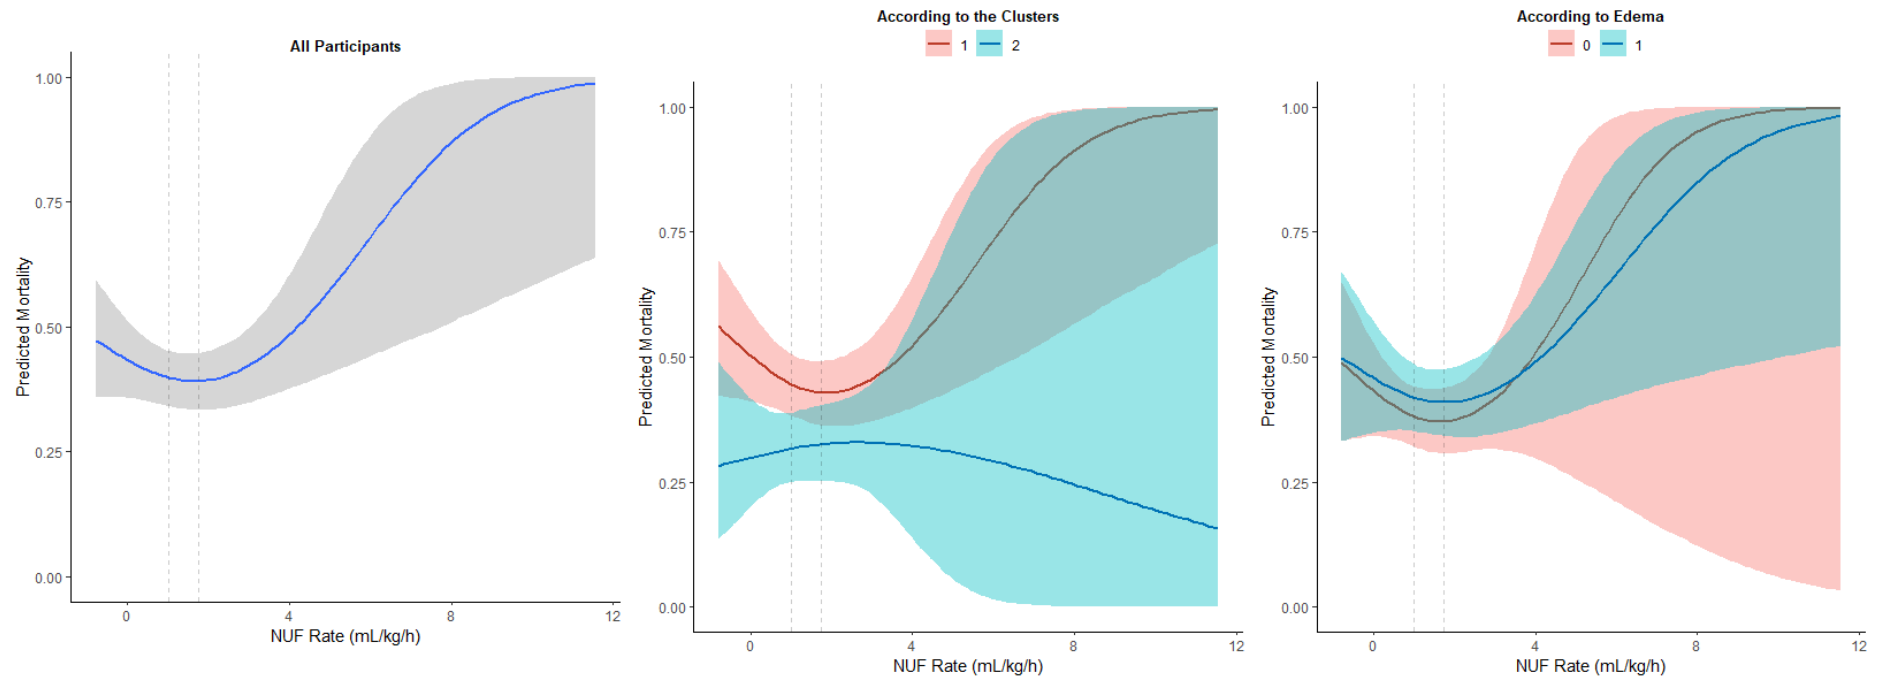

Cubic spline plot- NUF treated as continuous variable and was adjusted by cardiovascular SOFA, non-CRRT IV fluid, APACHE-III score and randomization group. Results are presented as marginal effect plots for the whole population, according to the cluster (from an interaction between cluster and NUF rate), and according to the presence of edema (from an interaction between presence of edema and NUF rate). *NUF: net ultrafiltration; SOFA: Sequential Organ Failure Assessment;*
